# Supplementary material for: Tritrophic metabolism of plant chemical defenses and its effects on herbivore and predator performance
Source: eLife. 2019 Dec 16;8:e51029. doi: 10.7554/eLife.51029 (PMC6934381; doi:10.7554/eLife.51029)
Supplement: Figure 1—figure supplement 1—source data 1. [file elife-51029-fig1-figsupp1-data1.xlsx]

## Sheet: Figure 1 - figure supplement 1
Figure 1 - figure supplement 1A
gss2 gene transcripts in different tissues									Tukey HSD tests in conjuction with a two-way ANOVA
	Col-0	myb28myb29	Col-0	myb28myb29	Col-0	myb28myb29			Source	Type III Sum of Squares	df	Mean Square	F	Sig.
#	Midgut epithelium		Hemolymph		Integument+fat body				Corrected Model	5.88	5	1.17609	11.0992	1.27416e-05
1	1.40589	0.419952	0.145089	0.138392	0.0958384	0.166017			Intercept	4.5826	1	4.5826	43.2475	8.40881e-07
2	0.371536	0.344196	0.156147	0.144303	0.155274	0.211016			Plants	0.873562	1	0.873562	8.2441	0.00840866
3	1.18719	0.339355	0.178308	0.159834	0.21136	0.183076			Tissues	3.16658	2	1.58329	14.942	6.09552e-05
4	1.31251	0.385641	0.169471	0.141949	0.160494	0.168844			Plants * Tisues	1.84033	2	0.920165	8.6839	0.00145407
5	2.57742	0.158224	0.142316	0.150266	0.153329	0.191852			Residuals	2.54309	24	0.105962
Average	1.37091	0.329474	0.158266	0.146949	0.155259	0.184161			Total	13.0062	30
STDEV	0.789432	0.10122	0.01549	0.00840028	0.0409549	0.0183395			Corrected Total	8.42356	29
StdEr	0.353045	0.045267	0.00692733	0.00375672	0.0183156	0.00820169
Figure 1 - figure supplement 1B
gss3 gene transcripts in different tissues									Tukey HSD tests in conjuction with a two-way ANOVA
	Col-0	myb28myb29	Col-0	myb28myb29	Col-0	myb28myb29			Source	Type III Sum of Squares	df	Mean Square	F	Sig.
#	Midgut epithelium		Hemolymph		Integument+fat body				Corrected Model	25.71	5	5.14195	22.4654	2.46352e-08
1	4.00239	0.581658	0.142024	0.156283	0.134788	0.209877			Intercept	16.1202	1	16.1202	70.4299	1.33869e-08
2	3.58271	1.17148	0.173816	0.206598	0.138491	0.221638			Plants	2.68702	1	2.68702	11.7397	0.00220973
3	1.1793	0.638149	0.285404	0.286187	0.214694	0.142879			Tissues	16.7584	2	8.3792	36.6091	5.12346e-08
4	2.53792	0.529131	0.147173	0.296237	0.238226	0.174581			Plants * Tisues	6.26431	2	3.13216	13.6845	0.000108172
5	2.37379	1.30241	0.160596	0.33574	0.17338	0.253496			Residuals	5.49319	24	0.228883
Average	2.73522	0.844566	0.181802	0.256209	0.179916	0.200495			Total	47.3231	30
STDEV	1.10843	0.363223	0.0592208	0.0729257	0.0458389	0.0428232			Corrected Total	31.2029	29
StdEr	0.495703	0.162438	0.0264844	0.0326134	0.0204998	0.0191511
Figure 1 - figure supplement 1C
Detoxification-related gene transcripts in different tissues
	Col-0	myb28myb29	Col-0	myb28myb29	Col-0	myb28myb29	Col-0	myb28myb29	Col-0	myb28myb29	Col-0	myb28myb29	Col-0	myb28myb29	Col-0	myb28myb29	Col-0	myb28myb29	Col-0	myb28myb29	Col-0	myb28myb29	Col-0	myb28myb29	Col-0	myb28myb29	Col-0	myb28myb29
#	cyp6cv2		cyp6bg1		cyp9g2		cyp9g4		gsto2		gste3		cceo16b		ugt		gss1		gss2		gss3		sulfatase		arylsulfatase-b		sumf1
1	0.633371	1.89371	0.808947	0.873505	1.02153	0.875952	1.07322	0.769698	0.320233	0.241347	0.645665	0.462135	1.21776	1.40415	1.9703	0.897786	3.45035	0.239972	1.40589	0.419952	4.00239	0.581658	0.432977	0.419831	0.195914	1.25268	0.932009	0.572839
2	0.594171	0.120017	0.929324	0.279088	1.12271	0.232456	0.73565	0.184206	0.253488	0.0596674	0.669958	0.552064	1.4101	0.150488	0.932808	0.158776	3.89256	0.253415	0.371536	0.344196	3.58271	1.17148	2.90271	0.835008	0.217812	0.0106177	1.0468	0.658166
3	0.613244	0.33003	1.32485	0.62707	0.781631	0.436973	0.914266	0.521226	0.575068	0.11055	0.832643	0.762558	1.69816	1.04885	2.09253	1.04013	3.81342	0.100997	1.18719	0.339355	1.1793	0.638149	2.26919	1.71166	0.595834	0.936831	1.08802	1.13465
4	0.966783	0.95561	0.950227	0.965411	0.91255	1.14227	0.805553	0.986311	0.238278	0.563306	0.647495	0.914314	1.65826	0.870037	1.43627	0.764249	2.89267	0.244676	1.31251	0.385641	2.53792	0.529131	1.65511	0.388424	4.5741	1.30984	0.793714	1.18612
5	0.504782	2.57643	1.5093	1.5295	1.20484	1.82015	0.882924	1.53644	0.190465	0.637639	0.907633	0.663415	1.23069	1.07439	1.82161	0.984742	3.63123	0.175877	2.57742	0.158224	2.37379	1.30241	1.737	0.451406	1.80191	5.92013	1.28671	0.784206
Average	0.66247	1.17516	1.10453	0.854916	1.00865	0.90156	0.882322	0.799577	0.315507	0.322502	0.740679	0.670897	1.44299	0.909583	1.65071	0.769137	3.53604	0.202987	1.37091	0.329474	2.73522	0.844566	1.7994	0.761266	1.47711	1.88602	1.02945	0.867197
STDEV	0.177064	1.04351	0.297596	0.461279	0.167658	0.625688	0.127346	0.508649	0.152349	0.263576	0.121494	0.177068	0.228218	0.466085	0.471148	0.356735	0.398239	0.0647799	0.789432	0.10122	1.10843	0.363223	0.912392	0.561314	1.85073	2.31437	0.1837	0.2786
StdEr	0.0791854	0.466672	0.133089	0.20629	0.0749789	0.279816	0.0569509	0.227475	0.0681324	0.117875	0.0543339	0.0791871	0.102062	0.20844	0.210704	0.159537	0.178098	0.0289704	0.353045	0.045267	0.495703	0.162438	0.408034	0.251027	0.82767	1.03502	0.0821532	0.124594
	Two-tailed t-test for two independent means
		t-value	P-value
	cyp6cv2	-1.08313	0.310314
	cyp6bg1	1.01677	0.339023
	cyp9g2	0.36968	0.721218
	cyp9g4	0.35287	0.733307
	gsto2	-0.05138	0.960282
	gste3	0.72663	0.488168
	cceo16b	2.29833	0.50602
	ugt	3.33564	0.010298
	gss1	18.472	< 0.00001
	gss2	2.92592	0.019117
	gss3	3.62445	0.006739
	sulfatase	2.16698	0.06211
	arylsulfatase-b	-0.30855	0.765545
	sumf1	1.0872	0.308615
