# Supplementary material for: Tritrophic metabolism of plant chemical defenses and its effects on herbivore and predator performance
Source: eLife. 2019 Dec 16;8:e51029. doi: 10.7554/eLife.51029 (PMC6934381; doi:10.7554/eLife.51029)
Supplement: Figure 1—figure supplement 3—source data 1. [file elife-51029-fig1-figsupp3-data1.xlsx]

## Sheet: Figure 1 - figure supplement 3
Figure 1 - figure supplement 3B
Glucosinolate content
		Col-0			myb28myb29
	#	Untreated	EV control	gss1 RNAi	Untreated	EV control	gss1 RNAi		Tukey HSD tests in conjuction with a one-way ANOVA
3MSOP	1	2.17287	1.90403	2.10536	0	0	0		3MSOP
	2	2.12253	2.17015	2.14221	0	0	0			Sum of Squares	df	Mean Square	F	Sig.
	3	2.29062	2.37303	2.33509	0	0	0		Between Groups	0.0208468	2	0.0104234	0.577102	0.576368
	4	2.18968	2.1311	1.92174	0	0	0		Residuals	0.21674	12	0.0180616
	5	2.24593	2.09949	2.08786	0	0	0		Total	0.237586	14
4MTB	1	1.91505	0.780829	1.54672	0	0	0		4MTB
4MTB	2	1.10231	1.71633	1.32691	0	0	0			Sum of Squares	df	Mean Square	F	Sig.
4MTB	3	2.80884	2.20874	2.07475	0	0	0		Between Groups	0.348286	2	0.174143	0.515189	0.610022
4MTB	4	1.1646	1.31091	0.732911	0	0	0		Residuals	4.05621	12	0.338017
4MTB	5	1.71598	1.783	1.15918	0	0	0		Total	4.40449	14
4MSOB	1	13.8039	11.0712	14.5152	0	0	0		4MSOB
4MSOB	2	13.5621	13.8508	14.5299	0	0	0			Sum of Squares	df	Mean Square	F	Sig.
4MSOB	3	15.7043	15.3053	16.1351	0	0	0		Between Groups	2.64687	2	1.32344	0.685208	0.522658
4MSOB	4	13.0703	12.6551	12.5817	0	0	0		Residuals	23.1772	12	1.93144
4MSOB	5	15.4953	14.5679	14.3722	0	0	0		Total	25.8241	14
5MSOP	1	0.369851	0.416695	0.394469	0	0	0		5MSOP
5MSOP	2	0.382389	0.4169	0.396981	0	0	0			Sum of Squares	df	Mean Square	F	Sig.
5MSOP	3	0.399173	0.430933	0.452136	0	0	0		Between Groups	0.0007948	2	0.0003974	0.6508	0.539094
5MSOP	4	0.436017	0.442923	0.4198	0	0	0		Residuals	0.0073276	12	0.000610633
5MSOP	5	0.448447	0.415987	0.421348	0	0	0		Total	0.0081224	14
7MSOH	1	0.092853	0.0935763	0.115083	0	0	0		7MSOH
7MSOH	2	0.144788	0.109764	0.159696	0	0	0			Sum of Squares	df	Mean Square	F	Sig.
7MSOH	3	0.145969	0.115301	0.131149	0	0	0		Between Groups	0.000545733	2	0.000272867	0.445061	0.650947
7MSOH	4	0.0748513	0.0982035	0.109938	0	0	0		Residuals	0.0073572	12	0.0006131
7MSOH	5	0.113647	0.14661	0.116366	0	0	0		Total	0.00790293	14
8MSOO	1	0.440953	0.34783	0.638301	0	0	0		8MSOO
8MSOO	2	0.611968	0.556987	0.85398	0	0	0			Sum of Squares	df	Mean Square	F	Sig.
8MSOO	3	0.756696	0.652849	0.803601	0	0	0		Between Groups	0.0852569	2	0.0426285	1.05376	0.378777
8MSOO	4	0.209255	0.414657	0.408054	0	0	0		Residuals	0.485444	12	0.0404537
8MSOO	5	0.482025	0.909946	0.715751	0	0	0		Total	0.570701	14
I3M	1	2.3638	3.06185	2.31008	4.54013	3.76307	3.86235		I3M
I3M	2	2.68299	3.04886	2.54932	3.55923	3.94641	2.99189			Sum of Squares	df	Mean Square	F	Sig.
I3M	3	2.37603	2.97254	3.01499	4.17934	4.04733	3.69689		Between Groups	5.05127	5	1.01025	4.03052	0.00850517
I3M	4	3.72481	4.24942	3.16236	3.41864	3.50142	3.85327		Residuals	6.01563	24	0.250651
I3M	5	2.83183	2.65392	2.99613	3.08941	3.88664	2.67541		Total	11.0669	29
4MOI3M	1	0.656983	0.782152	0.70308	1.0672	0.631691	0.668659		4MOI3M
4MOI3M	2	0.624251	0.688943	0.703417	1.12267	0.480186	0.747957			Sum of Squares	df	Mean Square	F	Sig.
4MOI3M	3	0.82428	0.919113	0.815617	0.918415	0.623476	0.765789		Between Groups	0.78542	5	0.157084	7.66635	0.0001994
4MOI3M	4	1.06144	1.19793	1.05689	1.18517	0.559491	0.670993		Residuals	0.491761	24	0.02049
4MOI3M	5	0.873167	0.679239	0.785119	1.08606	0.442312	0.552222		Total	1.27718	29
1MOI3M	1	0.0356069	0.0319564	0.0432322	0.0792889	0.0365031	0.0445186		1MOI3M
1MOI3M	2	0.045963	0.028626	0.0476619	0.0713419	0.0398672	0.0492386			Sum of Squares	df	Mean Square	F	Sig.
1MOI3M	3	0.0335624	0.0430168	0.0484722	0.0707932	0.0451947	0.0612448		Between Groups	0.00200307	5	0.000400613	3.47553	0.0166996
1MOI3M	4	0.0715082	0.056594	0.0564727	0.0548909	0.0398756	0.0530917		Residuals	0.0027664	24	0.000115267
1MOI3M	5	0.0528066	0.0308	0.0450277	0.0404422	0.0367153	0.0475499		Total	0.00476947	29
Figure 1 - figure supplement 3C
Secondary metabolites									Tukey HSD tests in conjuction with a one-way ANOVA
		Col-0			myb28myb29				KRGR
	#	Untreated	EV control	gss1 RNAi	Untreated	EV control	gss1 RNAi			Sum of Squares	df	Mean Square	F	Sig.
KRGR	1	271.794	361.393	310.494	278.428	241.436	269.091		Between Groups	16572.5	5	3314.5	1.13266	0.370218
KRGR	2	268.781	325.511	311.87	276.273	260.734	293.532		Residuals	70231.2	24	2926.3
KRGR	3	225.371	199.239	277.413	279.411	246.817	411.121		Total	86803.7	29
KRGR	4	217.924	192.285	268.391	269.867	337.129	382.893		KGR
KRGR	5	303.722	172.522	198.679	262.96	317.057	261.735			Sum of Squares	df	Mean Square	F	Sig.
KGR	1	243.346	346.08	265.555	247.521	182.98	227.365		Between Groups	14185.8	5	2837.17	0.923069	0.483199
KGR	2	238.731	299.27	266.169	241.596	214.685	249.126		Residuals	73767	24	3073.63
KGR	3	191.079	178.419	199.785	235.295	193.854	359.758		Total	87952.9	29
KGR	4	183.345	162.021	191.533	225.332	297.617	333.209		KRR
KGR	5	255.263	129.899	163.427	226.049	280.389	241.362			Sum of Squares	df	Mean Square	F	Sig.
KRR	1	587.773	840.109	696.536	594.736	485.544	543.736		Between Groups	47273.5	5	9454.71	0.594677	0.70421
KRR	2	579.926	751.9	696.329	589.423	543.757	608.084		Residuals	381574	24	15898.9
KRR	3	490.755	441.285	600.359	597.291	494.848	873.323		Total	428847	29
KRR	4	472.935	424.541	575.963	577.821	696.965	760.51		SinGluc
KRR	5	650.703	339.372	433.774	550.55	667.381	585.139			Sum of Squares	df	Mean Square	F	Sig.
SinGluc	1	121.625	70.0011	0	94.375	75.4437	95.373		Between Groups	14637.8	5	2927.55	1.59392	0.199845
SinGluc	2	129.835	63.4446	0	92.6821	68.2934	98.8795		Residuals	44080.8	24	1836.7
SinGluc	3	0	58.348	81.9445	75.3414	61.152	126.099		Total	58718.5	29
SinGluc	4	0	56.5995	81.3565	72.1688	110.148	193.624		SinMal
SinGluc	5	165.134	55.7936	82.3059	83.0162	126.59	80.7629			Sum of Squares	df	Mean Square	F	Sig.
SinMal	1	191.273	109.134	0	129.938	79.4517	121.539		Between Groups	51429.1	5	10285.8	2.45735	0.0620992
SinMal	2	196.036	0	0	121.667	112.687	0		Residuals	100458	24	4185.73
SinMal	3	171.82	94.1995	266.809	134.395	0	46.5412		Total	151887	29
SinMal	4	96.978	130.509	207.189	120.027	0	34.0895
SinMal	5	219.549	66.8231	148.294	90.5636	103.568	94.3265
