# Supplementary material for: Tritrophic metabolism of plant chemical defenses and its effects on herbivore and predator performance
Source: eLife. 2019 Dec 16;8:e51029. doi: 10.7554/eLife.51029 (PMC6934381; doi:10.7554/eLife.51029)
Supplement: Figure 1—figure supplement 4—source data 1. [file elife-51029-fig1-figsupp4-data1.xlsx]

## Sheet: Figure 1 - figure supplement 4
Figure 1 - figure supplement 4A
gss2 gene transcripts in Midgut epithelium
	Col-0	Col-0	myb28myb29	myb28myb29			Tukey HSD tests in conjuction with a one-way ANOVA
#	EV control	gss1 RNAi	EV control	gss1 RNAi			gss2
1	1.37145	0.0501656	0.453779	0.0619917				Sum of Squares	df	Mean Square	F	Sig.
2	2.22628	0.0493596	0.293292	0.0678652			Between Groups	7.0045	3	2.33483	14.8315	6.99076e-05
3	0.421162	0.0397203	0.279911	0.0657322			Residuals	2.51879	16	0.157424
4	2.31629	0.0849726	0.358144	0.073276			Total	9.52328	19
5	1.14899	0.0718054	0.310128	0.0668029
Average	1.49683	0.0592047	0.339051	0.0671336			gss3
STDEV	0.790156	0.0185811	0.0706312	0.00408584				Sum of Squares	df	Mean Square	F	Sig.
StdEr	0.353368	0.00830973	0.0315872	0.00182724			Between Groups	17.8258	3	5.94194	14.81	7.04954e-05
							Residuals	6.4194	16	0.401212
gss3 gene transcripts in Midgut epithelium							Total	24.2452	19
	Col-0	Col-0	myb28myb29	myb28myb29
#	EV control	gss1 RNAi	EV control	gss1 RNAi
1	2.21132	0.144448	0.385164	0.191816
2	0.742168	0.151163	1.0668	0.139239
3	3.94157	0.281583	0.452251	0.206216
4	2.27249	0.142214	0.900948	0.380333
5	3.33685	0.0733012	0.63201	0.390896
Average	2.50088	0.158542	0.687435	0.2617
STDEV	1.2251	0.0757046	0.291229	0.115893
StdEr	0.547882	0.0338561	0.130242	0.0518287
Figure 1 - figure supplement 4B
In vitro enzyme assay							Tukey HSD tests in conjuction with a one-way ANOVA
	Col-0	Col-0	myb28myb29	myb28myb29				Sum of Squares	df	Mean Square	F	Sig.
#	EV control	gss1 RNAi	EV control	gss1 RNAi			Between Groups	10.919	3	3.63966	18.6956	5.08256e-06
1	1.32706	0.429176	1.24518	0.536471			Residuals	3.8936	20	0.19468
2	0.883765	0.629647	1.32424	0.592941			Total	14.8126	23
3	0.550588	0.525176	1.29035	0.403765
4	0.700235	0.550588	1.31859	0.513882
5	1.18024	0.468706	2.04424	0.883765
6	1.19718	0.584471	2.05835	0.624
Average	0.973176	0.531294	1.54682	0.592471
STDEV	0.30963	0.0738323	0.391787	0.161721
StdEr	0.126406	0.0301419	0.159946	0.0660224
Figure 1 - figure supplement 4C
sulfatase gene transcripts in Midgut epithelium							Tukey HSD tests in conjuction with a one-way ANOVA
	Col-0	Col-0	myb28myb29	myb28myb29			sulfatase
#	EV control	gss1 RNAi	EV control	gss1 RNAi				Sum of Squares	df	Mean Square	F	Sig.
1	0.265265	0.795532	0.718357	1.41897			Between Groups	0.63552	3	0.21184	0.589746	0.630563
2	2.24478	0.966891	1.64931	0.422216			Residuals	5.74729	16	0.359206
3	0.848312	1.49898	0.171036	0.601005			Total	6.38281	19
4	1.2616	0.587889	0.223424	0.457928
5	0.408538	0.479839	0.0605753	0.238925			arysulfatase-b
Average	1.0057	0.865827	0.56454	0.627809				Sum of Squares	df	Mean Square	F	Sig.
STDEV	0.795366	0.400712	0.656803	0.46071			Between Groups	1.03461	3	0.344869	2.54929	0.0922607
StdEr	0.355699	0.179204	0.293731	0.206036			Residuals	2.16449	16	0.135281
							Total	3.1991	19
arysulfatase-b gene transcripts in Midgut epithelium
	Col-0	Col-0	myb28myb29	myb28myb29			sumf1
#	EV control	gss1 RNAi	EV control	gss1 RNAi				Sum of Squares	df	Mean Square	F	Sig.
1	1.79775	1.1331	0.968439	0.446989			Between Groups	0.171265	3	0.0570884	5.13459	0.0112009
2	0.696231	1.32314	1.22526	0.247142			Residuals	0.177894	16	0.0111184
3	0.581976	1.19818	0.367353	0.380969			Total	0.349159	19
4	0.700542	0.93315	0.599286	0.554338
5	0.357638	0.849038	0.269616	0.67105
Average	0.826827	1.08732	0.685991	0.460098
STDEV	0.560308	0.193999	0.404044	0.162146
StdEr	0.250577	0.0867589	0.180694	0.072514
sumf1 gene transcripts in Midgut epithelium
	Col-0	Col-0	myb28myb29	myb28myb29
#	EV control	gss1 RNAi	EV control	gss1 RNAi
1	1.24712	1.5961	1.41044	1.30402
2	1.24302	1.39968	1.31596	1.32761
3	1.23185	1.44262	1.54949	1.24812
4	1.37923	1.49795	1.52045	1.2617
5	1.58545	1.45006	1.57964	1.16389
Average	1.33734	1.47728	1.47519	1.26107
STDEV	0.151224	0.0750145	0.109574	0.0630181
StdEr	0.0676293	0.0335475	0.0490029	0.0281825
