# Supplementary material for: Tritrophic metabolism of plant chemical defenses and its effects on herbivore and predator performance
Source: eLife. 2019 Dec 16;8:e51029. doi: 10.7554/eLife.51029 (PMC6934381; doi:10.7554/eLife.51029)
Supplement: Figure 1—source data 1. [file elife-51029-fig1-data1.xlsx]

## Sheet: Figure 1
Figure 1A
gss1 gene transcripts in different tissues								Tukey HSD tests in conjuction with a two-way ANOVA
	Col-0	myb28myb29	Col-0	myb28myb29	Col-0	myb28myb29		Source	Type III Sum of Squares	df	Mean Square	F	Sig.
#	Midgut epithelium		Hemolymph		Integument+fat body			Corrected Model	47.987	5	9.5975	349.032	1.38234e-21
1	3.45035	0.239972	0.118801	0.099011	0.120863	0.143744		Intercept	15.0685	1	15.0685	547.995	4.89463e-18
2	3.89256	0.253415	0.143497	0.147752	0.103227	0.125609		Plants	9.29504	1	9.29504	338.032	1.19838e-15
3	3.81342	0.100997	0.150195	0.130042	0.113509	0.174557		Tissues	20.2118	2	10.1059	367.522	9.98475e-19
4	2.89267	0.244676	0.154237	0.109	0.1185	0.0927251		Plants * Tisues	18.4806	2	9.24031	336.042	2.82223e-18
5	3.63123	0.175877	0.128563	0.0825559	0.148585	0.161431		Residuals	0.659939	24	0.0274975
Average	3.53604	0.202987	0.139059	0.113672	0.120937	0.139613		Total	63.7159	30
STDEV	0.398239	0.0647799	0.0149551	0.0256632	0.0168758	0.0320497		Corrected Total	48.6474	29
StdEr	0.178098	0.0289704	0.00668813	0.0114769	0.00754709	0.0143331
Figure 1F
gss1 gene transcripts in Midgut epithelium								Tukey HSD tests in conjuction with a one-way ANOVA
	Col-0	Col-0	myb28myb29	myb28myb29					Sum of Squares	df	Mean Square	F	Sig.
#	EV control	gss1 RNAi	EV control	gss1 RNAi				Between Groups	30.9786	3	10.3262	185.508	1.22656e-12
1	2.21671	0.0964952	0.207226	0.0925719				Residuals	0.89063	16	0.0556644
2	2.89295	0.0187407	0.29546	0.090488				Total	31.8693	19
3	3.33833	0.0862313	0.10537	0.0662909
4	3.24949	0.0597348	0.104443	0.0238316
5	3.21577	0.0330289	0.291858	0.0974358
Average	2.98265	0.0588462	0.200871	0.0741236
STDEV	0.460098	0.0333285	0.0944523	0.0305869
StdEr	0.205762	0.014905	0.0422403	0.0136789
Figure 1G
In vitro enzyme assay								Tukey HSD tests in conjuction with a one-way ANOVA
	Col-0	Col-0	myb28myb29	myb28myb29					Sum of Squares	df	Mean Square	F	Sig.
#	EV control	gss1 RNAi	EV control	gss1 RNAi				Between Groups	51.2442	3	17.0814	10.6974	0.000207701
1	2.21065	4.54861	2.34954	0.413194				Residuals	31.9355	20	1.59678
2	4.78009	2.55787	1.89815	0.652778				Total	83.1798	23
3	7.8588	7.80093	1.12384	0.347222
4	6.49306	2.1875	1.42361	0.302083
5	7.98611	1.05903	1.35417	0.533565
6	10.3935	1.21528	2.93981	1.13426
Average	6.62037	3.2282	1.84819	0.56385
STDEV	2.84549	2.56682	0.692025	0.307356
StdEr	1.16167	1.0479	0.282518	0.125478
