# Supplementary material for: Tritrophic metabolism of plant chemical defenses and its effects on herbivore and predator performance
Source: eLife. 2019 Dec 16;8:e51029. doi: 10.7554/eLife.51029 (PMC6934381; doi:10.7554/eLife.51029)
Supplement: Figure 2—figure supplement 1—source data 1. [file elife-51029-fig2-figsupp1-data1.xlsx]

## Sheet: Figure 2 - figure supplement 1
Figure 2 - figure supplement 1
pupa weights
	Col-0	Col-0	myb28myb29	myb28myb29
#	EV control	gss1 RNAi	EV control	gss1 RNAi		Tukey HSD tests in conjuction with a one-way ANOVA
1	5.3	4.2	6.3	5.2			Sum of Squares	df	Mean Square	F	Sig.
2	5.5	4.5	5.3	5.2		Between Groups	0.668917	3	0.222972	0.498028	0.684369
3	4.5	4.5	5.2	4.8		Residuals	51.9343	116	0.44771
4	3.4	5.1	4.5	4.1		Total	52.6033	119
5	5.9	4.3	4.3	4.3
6	4.5	5.9	4.5	5.5
7	4.3	4.6	4.4	6.1
8	5.4	4.4	4.9	6.7
9	5	5.5	4.8	4.9
10	3.5	4.9	4.5	3.8
11	4.2	5.1	6.3	6.2
12	5.1	4.8	5.5	5.1
13	4.9	5.3	4.7	4.7
14	4.9	4.2	4.6	3.9
15	4.7	4.9	5.2	4.1
16	5.3	4.4	3.9	4.3
17	4.9	4.4	5.2	5.7
18	4.6	5.4	4.5	3.9
19	5.2	4.5	5.1	4.2
20	4.2	3.9	5.1	5.6
21	5.6	4.6	5	5.3
22	5.2	4.8	5.2	4.5
23	5.2	3.6	4	4.3
24	5.6	3.5	5.2	5.4
25	5.3	5.2	5.3	4.4
26	5	5.9	5.9	5.2
27	4.8	5.1	4.9	4.3
28	6.5	5.7	4	4.4
29	6.3	5	4.5	4.5
30	4.3	5.1	4.3	4
Average	4.97	4.77667	4.90333	4.82
StDev	0.698348	0.60554	0.606564	0.754024
StdEr	0.1275	0.110556	0.110743	0.137665
