# Supplementary material for: Tritrophic metabolism of plant chemical defenses and its effects on herbivore and predator performance
Source: eLife. 2019 Dec 16;8:e51029. doi: 10.7554/eLife.51029 (PMC6934381; doi:10.7554/eLife.51029)
Supplement: Figure 2—figure supplement 2—source data 1. [file elife-51029-fig2-figsupp2-data1.xlsx]

## Sheet: Figure 1 - figure supplement 2
	Figure 2 - figure supplement 2A,E												Figure 2 - figure supplement 2B,F
	Female												Male
	Col-0				myb28myb29		myb28myb29		Col-0		myb28myb29	myb28myb29	Col-0				myb28myb29		myb28myb29		Col-0		myb28myb29	myb28myb29			Tukey HSD tests in conjuction with a one-way ANOVA
	EV control		gss1 RNAi		EV control		gss1 RNAi		EV control	gss1 RNAi	EV control	gss1 RNAi	EV control		gss1 RNAi		EV control		gss1 RNAi		EV control	gss1 RNAi	EV control	gss1 RNAi			Female	Number of egg laid
#	egg laid	egg hatched	egg laid	egg hatched	egg laid	egg hatched	egg laid	egg hatched	Egg hatching (%)				egg laid	egg hatched	egg laid	egg hatched	egg laid	egg hatched	egg laid	egg hatched	Egg hatching (%)							Sum of Squares	df	Mean Square	F	Sig.
1	61	59	7	7	33	9	21	20	96.7213	100	27.2727	95.2381	51	48	55	12	42	26	40	32	94.1176	21.8182	61.9048	80			Between Groups	8869.84	3	2956.61	13.5604	3.57067e-07
2	32	29	9	8	27	26	39	38	90.625	88.8889	96.2963	97.4359	52	36	29	24	31	30	42	27	69.2308	82.7586	96.7742	64.2857			Residuals	16570.5	76	218.034
3	49	44	12	3	51	44	62	21	89.7959	25	86.2745	33.871	39	36	37	8	37	11	51	29	92.3077	21.6216	29.7297	56.8627			Total	25440.4	79
4	38	7	46	41	62	60	62	59	18.4211	89.1304	96.7742	95.1613	11	11	64	18	62	60	39	37	100	28.125	96.7742	94.8718
5	44	41	39	20	42	38	45	42	93.1818	51.2821	90.4762	93.3333	9	3	62	41	57	21	22	20	33.3333	66.129	36.8421	90.9091			Male	Number of egg laid
6	51	12	12	11	43	35	52	26	23.5294	91.6667	81.3953	50	52	8	62	9	12	12	10	9	15.3846	14.5161	100	90				Sum of Squares	df	Mean Square	F	Sig.
7	46	7	9	9	10	8	10	7	15.2174	100	80	70	48	41	64	60	13	11	58	8	85.4167	93.75	84.6154	13.7931			Between Groups	911.85	3	303.95	0.799788	0.497802
8	29	29	44	11	56	52	34	7	100	25	92.8571	20.5882	64	39	12	7	15	12	29	8	60.9375	58.3333	80	27.5862			Residuals	28882.9	76	380.038
9	66	32	51	48	37	36	46	41	48.4848	94.1176	97.2973	89.1304	63	46	37	22	21	21	60	36	73.0159	59.4595	100	60			Total	29794.8	79
10	62	60	32	15	62	55	42	22	96.7742	46.875	88.7097	52.381	28	27	32	4	62	60	52	44	96.4286	12.5	96.7742	84.6154
11	38	37	23	22	49	13	43	11	97.3684	95.6522	26.5306	25.5814	17	7	24	4	54	15	18	7	41.1765	16.6667	27.7778	38.8889			Non-parametric Kruskal-Wallis tests with Dunn's post hoc tests
12	35	33	16	14	46	23	43	42	94.2857	87.5	50	97.6744	61	32	9	3	54	52	44	30	52.459	33.3333	96.2963	68.1818			Female	Egg hatching (%)
13	46	20	8	8	55	53	45	38	43.4783	100	96.3636	84.4444	18	18	92	42	59	40	17	17	100	45.6522	67.7966	100			X-squared	df	P-value
14	19	18	21	20	53	11	55	46	94.7368	95.2381	20.7547	83.6364	44	44	59	9	38	35	19	15	100	15.2542	92.1053	78.9474			1.0377	3	0.7921
15	22	14	10	9	54	53	62	55	63.6364	90	98.1481	88.7097	8	2	22	12	60	29	56	55	25	54.5455	48.3333	98.2143
16	58	16	14	3	26	26	28	25	27.5862	21.4286	100	89.2857	64	51	61	23	9	9	56	41	79.6875	37.7049	100	73.2143			Male	Egg hatching (%)
17	49	49	8	3	57	54	23	13	100	37.5	94.7368	56.5217	9	7	46	19	18	17	56	15	77.7778	41.3043	94.4444	26.7857			X-squared	df	P-value
18	63	62	9	9	25	22	40	39	98.4127	100	88	97.5	16	13	46	38	20	18	25	24	81.25	82.6087	90	96			16.835	3	0.0007642
19	42	40	8	8	62	21	22	20	95.2381	100	33.871	90.9091	61	50	57	7	34	30	59	53	81.9672	12.2807	88.2353	89.8305
20	34	33	8	2	61	57	12	3	97.0588	25	93.4426	25	56	54	51	46	48	47	39	38	96.4286	90.1961	97.9167	97.4359
	Figure 2 - figure supplement 2C,G												Figure 2 - figure supplement 2D,H
	Female												Male														Tukey HSD tests in conjuction with a one-way ANOVA
	Col-0				myb28myb29		myb28myb29		Col-0		myb28myb29	myb28myb29	Col-0				myb28myb29		myb28myb29		Col-0		myb28myb29	myb28myb29			Female	Number of egg laid
	EV control		gss1 RNAi		EV control		gss1 RNAi		EV control	gss1 RNAi	EV control	gss1 RNAi	EV control		gss1 RNAi		EV control		gss1 RNAi		EV control	gss1 RNAi	EV control	gss1 RNAi				Sum of Squares	df	Mean Square	F	Sig.
#	egg laid	egg hatched	egg laid	egg hatched	egg laid	egg hatched	egg laid	egg hatched	Egg hatching (%)				egg laid	egg hatched	egg laid	egg hatched	egg laid	egg hatched	egg laid	egg hatched	Egg hatching (%)						Between Groups	4969.5	3	1656.5	6.17906	0.000816777
1	26	21	9	2	25	23	52	51	80.7692	22.2222	92	98.0769	52	50	46	42	55	46	44	31	96.1538	91.3043	83.6364	70.4545			Residuals	20374.3	76	268.083
2	38	37	20	20	22	21	65	14	97.3684	100	95.4545	21.5385	31	28	52	11	24	20	53	11	90.3226	21.1538	83.3333	20.7547			Total	25343.8	79
3	35	11	31	29	61	13	11	11	31.4286	93.5484	21.3115	100	49	37	29	16	26	23	26	24	75.5102	55.1724	88.4615	92.3077
4	43	9	46	11	52	50	62	59	20.9302	23.913	96.1538	95.1613	41	18	59	14	26	16	28	20	43.9024	23.7288	61.5385	71.4286			Male	Number of egg laid
5	62	61	39	38	37	36	31	28	98.3871	97.4359	97.2973	90.3226	11	10	37	9	25	21	61	53	90.9091	24.3243	84	86.8852				Sum of Squares	df	Mean Square	F	Sig.
6	53	50	46	42	61	58	59	11	94.3396	91.3043	95.082	18.6441	27	6	18	10	65	63	58	56	22.2222	55.5556	96.9231	96.5517			Between Groups	71.5	3	23.8333	0.0831822	0.969005
7	49	44	8	8	10	9	30	15	89.7959	100	90	50	35	30	24	20	34	33	53	31	85.7143	83.3333	97.0588	58.4906			Residuals	21775.5	76	286.52
8	61	13	39	37	29	14	21	10	21.3115	94.8718	48.2759	47.619	61	45	59	21	39	15	11	3	73.7705	35.5932	38.4615	27.2727			Total	21847	79
9	11	11	8	7	25	12	27	26	100	87.5	48	96.2963	9	9	61	21	12	11	18	17	100	34.4262	91.6667	94.4444
10	34	33	26	21	55	13	61	59	97.0588	80.7692	23.6364	96.7213	22	21	9	3	61	54	62	41	95.4545	33.3333	88.5246	66.129			Non-parametric Kruskal-Wallis tests with Dunn's post hoc tests
11	9	6	19	9	61	56	18	18	66.6667	47.3684	91.8033	100	36	10	8	7	18	15	35	32	27.7778	87.5	83.3333	91.4286			Female	Egg hatching (%)
12	22	10	27	24	49	39	37	6	45.4545	88.8889	79.5918	16.2162	17	15	66	34	9	9	37	35	88.2353	51.5152	100	94.5946			X-squared	df	P-value
13	53	51	36	10	58	49	63	51	96.2264	27.7778	84.4828	80.9524	49	41	23	3	44	19	45	37	83.6735	13.0435	43.1818	82.2222			0.50567	3	0.9176
14	61	57	35	35	46	40	44	42	93.4426	100	86.9565	95.4545	55	54	24	19	48	43	37	36	98.1818	79.1667	89.5833	97.2973
15	40	39	16	12	51	39	27	26	97.5	75	76.4706	96.2963	58	26	24	4	38	31	49	12	44.8276	16.6667	81.5789	24.4898			Male	Egg hatching (%)
16	48	20	20	5	22	18	59	55	41.6667	25	81.8182	93.2203	39	37	57	7	37	27	55	48	94.8718	12.2807	72.973	87.2727			X-squared	df	P-value
17	37	36	8	7	61	59	12	9	97.2973	87.5	96.7213	75	57	52	43	18	63	58	50	44	91.2281	41.8605	92.0635	88			21.991	3	6.552e-05
18	49	19	10	3	60	51	58	53	38.7755	30	85	91.3793	57	49	38	19	65	31	21	13	85.9649	50	47.6923	61.9048
19	46	45	12	11	59	58	46	44	97.8261	91.6667	98.3051	95.6522	49	47	45	18	62	56	34	33	95.9184	40	90.3226	97.0588
20	26	19	15	4	13	12	51	8	73.0769	26.6667	92.3077	15.6863	46	45	41	6	61	56	27	22	97.8261	14.6341	91.8033	81.4815
