# Supplementary material for: Tritrophic metabolism of plant chemical defenses and its effects on herbivore and predator performance
Source: eLife. 2019 Dec 16;8:e51029. doi: 10.7554/eLife.51029 (PMC6934381; doi:10.7554/eLife.51029)
Supplement: Figure 2—source data 1. [file elife-51029-fig2-data1.xlsx]

## Sheet: Figure 2
Figure 2A
4 dph						6 dph						8 dph
	Col-0	Col-0	myb28myb29	myb28myb29			Col-0	Col-0	myb28myb29	myb28myb29			Col-0	Col-0	myb28myb29	myb28myb29		Tukey HSD tests in conjuction with a two-way ANOVA
#	EV control	gss1 RNAi	EV control	gss1 RNAi		#	EV control	gss1 RNAi	EV control	gss1 RNAi		#	EV control	gss1 RNAi	EV control	gss1 RNAi		4 dph
1	2.1	2.5	2.4	2.2		1	3.8	6.1	6.4	3.5		1	3.1	2.2	9.5	5.4		Source	Type III Sum of Squares	df	Mean Square	F	Sig.	Partial Eta Squared
2	1.8	0.6	3.1	0.9		2	3.7	3.3	6.7	2.3		2	7.9	7.7	9.2	8.7		Corrected Model	5.311a	3	1.77031	1.67034	0.177236	0.0414096
3	0.4	0.6	2.2	3.5		3	6.1	5.4	2.4	6.6		3	3	6.1	9.6	7.2		Intercept	425.257	1	425.257	401.243	1.84979e-39	0.775734
4	0.6	1.9	3.5	3.1		4	1.5	2.7	3.4	4.8		4	5.7	2.8	8.5	9.5		Plants	3.57075	1	3.57075	3.36912	0.0689909	0.0282244
5	0.4	3.1	3.2	1.2		5	1.1	1	2.9	5.2		5	7.2	3.6	8	8.6		RNAi	1.43008	1	1.43008	1.34933	0.24778	0.0114984
6	1.8	2.2	3.3	3.2		6	1.8	1.8	4.7	2.1		6	6.8	4.4	6.9	8.3		Plants * RNAi	0.310083	1	0.310083	0.292573	0.589613	0.00251584
7	1.5	0.7	1.7	0.6		7	3.1	2.7	3.1	4.2		7	8.2	3.6	7.8	6.8		Residuals	122.942	116	1.05985
8	1	3.2	1.5	1.1		8	6.3	2.1	3.9	5.6		8	8.9	3.8	8.7	7.9		Total	553.51	120
9	0.6	0.5	2.2	2		9	2.9	4.2	7.1	4.3		9	4.5	4.7	9.5	8.7		Corrected Total	128.253	119
10	0.4	0.6	1.6	0.6		10	6.1	4.3	6.5	4.1		10	4.8	2.3	6.9	9.1
11	0.7	0.4	2.1	3.5		11	2.4	2.8	3.2	2		11	8.2	3.3	7.6	5.4		6 dph
12	2.2	1	1.9	0.7		12	1.5	1.5	6.8	5.1		12	7.3	3	9.3	5.8		Source	Type III Sum of Squares	df	Mean Square	F	Sig.	Partial Eta Squared
13	2	1.2	2.8	1.3		13	2.2	1.3	6.1	5.3		13	8.1	2.2	8.9	9.8		Corrected Model	94.098a	3	31.366	14.0776	6.90673e-08	0.266903
14	1.4	1.1	2.1	0.5		14	3.1	2.1	6.3	2.5		14	4.9	2.4	8.6	3.8		Intercept	1693.51	1	1693.51	760.076	9.33701e-53	0.867591
15	3.6	2.5	2.3	2.3		15	2.5	2	5.2	5.9		15	7.1	3.7	9.5	8.9		Plants	74.5763	1	74.5763	33.4712	6.25173e-08	0.223931
16	2.9	0.6	1.8	2.5		16	1.2	1.4	4.6	4.8		16	8.2	3.6	8.5	6.6		RNAi	16.5763	1	16.5763	7.43976	0.00737182	0.0602703
17	3.8	1.5	3.6	2.5		17	6.9	5.2	4.4	5.2		17	4	5	5.9	8.5		Plants * RNAi	2.94533	1	2.94533	1.32192	0.252613	0.0112674
18	2.5	0.7	2.2	1.3		18	7.1	1.1	5.1	5.3		18	6.5	2.4	8	8		Residuals	258.457	116	2.22807
19	2.5	1.9	3.4	3.9		19	6.8	1.9	3.8	3.2		19	8.5	2.3	8.5	8.3		Total	2046.06	120
20	2.7	0.7	1	3.7		20	1.9	1.3	4.5	3.6		20	6.3	2.2	6	9.6		Corrected Total	352.555	119
21	3.1	0.8	3.4	0.6		21	1.3	1.5	2	4.6		21	5.3	2	8.6	8.9
22	0.6	3.9	1.1	0.7		22	5.6	1.3	4.9	5.2		22	3.9	2.5	9.3	8.2		8 dph
23	0.8	3.2	1.7	0.7		23	3.2	1.2	5.1	3.9		23	7.9	3	9.8	6.1		Source	Type III Sum of Squares	df	Mean Square	F	Sig.	Partial Eta Squared
24	3.2	1.8	1.6	3.4		24	3.6	3.5	6.1	3.1		24	8	3.2	8.7	9.5		Corrected Model	436.819a	3	145.606	66.9189	3.43969e-25	0.633788
25	3.3	1.3	0.6	2.8		25	4.1	1.4	3.9	2.9		25	3.6	2.3	7.5	6.7		Intercept	5248.34	1	5248.34	2412.07	1.80115e-79	0.954115
26	1.9	1.7	0.8	3.8		26	2.7	1.3	4.6	3.8		26	6.4	3.1	9.4	9.8		Plants	316.225	1	316.225	145.333	3.42422e-22	0.556122
27	2.6	1.2	1.3	1.7		27	1.6	2.1	5.4	5.9		27	6.7	5.9	9.2	9.2		RNAi	80.688	1	80.688	37.0832	1.50857e-08	0.242242
28	2	1.1	1.7	2.9		28	2.8	3.7	3.3	4.9		28	6.5	4.8	9.6	8.9		Plants * RNAi	39.9053	1	39.9053	18.34	3.82848e-05	0.136519
29	0.8	0.8	0.6	1.4		29	3.2	1.9	4.6	5.3		29	6	2.8	8.6	9.6		Residuals	252.4	116	2.17586
30	2.9	3.2	2.7	1.3		30	4.8	1.1	5.8	4.7		30	8.1	6.9	8.3	8		Total	5937.56	120
Av	1.87	1.55	2.11333	1.99667		Av	3.49667	2.44	4.76	4.33		Av	6.38667	3.59333	8.48	7.99333		Corrected Total	689.219	119
StDEV	1.05835	0.999914	0.885801	1.15534		StDEV	1.87736	1.41314	1.38355	1.21518		StDEV	1.74212	1.49296	1.04069	1.53509
StdEr	0.193227	0.182558	0.161724	0.210936		StdEr	0.342757	0.258003	0.2526	0.22186		StdEr	0.318066	0.272575	0.190003	0.280268
Figure 2B
Plutella pupal mortality							A two-sided proportions test
	Col-0	Col-0	myb28myb29	myb28myb29				X-squared	df	P-value
#1	EV control	gss1 RNAi	EV control	gss1 RNAi			#1	28.872	3	2.383e-06
# pupae observed	63	60	66	59			#2	13.393	3	0.00386
# pupae died	6	23	6	5			#3	11.437	3	0.009582
% pupae died	9.52381	38.3333	9.09091	8.47458
Plutella pupal mortality
	Col-0	Col-0	myb28myb29	myb28myb29
#2	EV control	gss1 RNAi	EV control	gss1 RNAi
# pupae observed	50	50	50	50
# pupae died	4	16	5	7
% pupae died	8	32	10	14
Plutella pupal mortality
	Col-0	Col-0	myb28myb29	myb28myb29
#3	EV control	gss1 RNAi	EV control	gss1 RNAi
# pupae observed	42	43	40	40
# pupae died	3	11	3	2
% pupae died	7.14286	25.5814	7.5	5
	Figure 2C & 2E												Figure 2D & 2F
	Female												Male													Tukey HSD tests in conjuction with a one-way ANOVA
	Col-0				myb28myb29		myb28myb29		Col-0		myb28myb29	myb28myb29	Col-0				myb28myb29		myb28myb29		Col-0		myb28myb29	myb28myb29		Female	Number of egg laid
#	EV control		gss1 RNAi		EV control		gss1 RNAi		EV control	gss1 RNAi	EV control	gss1 RNAi	EV control		gss1 RNAi		EV control		gss1 RNAi		EV control	gss1 RNAi	EV control	gss1 RNAi			Sum of Squares	df	Mean Square	F	Sig.
	egg laid	egg hatched	egg laid	egg hatched	egg laid	egg hatched	egg laid	egg hatched	Egg hatching (%)				egg laid	egg hatched	egg laid	egg hatched	egg laid	egg hatched	egg laid	egg hatched	Egg hatching (%)					Between Groups	10759.2	3	3586.42	11.1568	3.79378e-06
1	56	47	33	29	70	21	59	56	83.9286	87.8788	30	94.9153	21	20	64	24	57	55	43	40	95.2381	37.5	96.4912	93.0233		Residuals	24430.7	76	321.457
2	32	30	6	1	69	68	32	30	93.75	16.6667	98.5507	93.75	68	66	53	4	42	38	29	22	97.0588	7.54717	90.4762	75.8621		Total	35189.9	79
3	48	46	7	4	66	36	16	16	95.8333	57.1429	54.5455	100	8	8	12	5	56	54	34	9	100	41.6667	96.4286	26.4706
4	52	21	21	6	46	44	20	18	40.3846	28.5714	95.6522	90	45	13	34	31	29	20	51	49	28.8889	91.1765	68.9655	96.0784		Male	Number of egg laid
5	36	10	7	7	69	65	71	22	27.7778	100	94.2029	30.9859	66	60	44	6	37	10	62	31	90.9091	13.6364	27.027	50			Sum of Squares	df	Mean Square	F	Sig.
6	24	22	49	44	58	30	59	18	91.6667	89.7959	51.7241	30.5085	39	37	21	11	44	41	37	34	94.8718	52.381	93.1818	91.8919		Between Groups	339.738	3	113.246	0.321214	0.81
7	38	32	62	61	60	58	55	50	84.2105	98.3871	96.6667	90.9091	19	5	8	3	59	16	37	36	26.3158	37.5	27.1186	97.2973		Residuals	26794.2	76	352.556
8	44	43	10	9	42	19	67	22	97.7273	90	45.2381	32.8358	70	12	6	4	52	51	42	9	17.1429	66.6667	98.0769	21.4286		Total	27134	79
9	18	16	14	12	65	61	62	58	88.8889	85.7143	93.8462	93.5484	8	7	52	25	55	41	21	19	87.5	48.0769	74.5455	90.4762
10	57	14	66	16	20	11	31	20	24.5614	24.2424	55	64.5161	54	52	29	7	28	27	48	43	96.2963	24.1379	96.4286	89.5833
11	46	43	13	11	31	30	46	41	93.4783	84.6154	96.7742	89.1304	30	28	47	38	16	14	66	49	93.3333	80.8511	87.5	74.2424		Non-parametric Kruskal-Wallis tests with Dunn's post hoc tests
12	41	38	11	10	42	41	22	3	92.6829	90.9091	97.619	13.6364	67	53	60	31	35	35	20	10	79.1045	51.6667	100	50		Female	Egg hatching (%)
13	25	24	8	8	57	55	29	27	96	100	96.4912	93.1034	7	5	33	9	38	30	9	6	71.4286	27.2727	78.9474	66.6667		X-squared	df	P-value
14	54	41	10	9	10	10	49	45	75.9259	90	100	91.8367	16	11	45	16	38	26	32	15	68.75	35.5556	68.4211	46.875		5.3758	3	0.1463
15	26	24	6	2	15	9	58	11	92.3077	33.3333	60	18.9655	12	8	54	47	34	33	41	40	66.6667	87.037	97.0588	97.561
16	48	23	19	4	58	56	66	63	47.9167	21.0526	96.5517	95.4545	64	59	52	7	40	37	8	7	92.1875	13.4615	92.5	87.5		Male	Egg hatching (%)
17	49	12	7	6	34	15	12	12	24.4898	85.7143	44.1176	100	58	45	8	6	42	9	59	41	77.5862	75	21.4286	69.4915		X-squared	df	P-value
18	61	60	11	10	66	65	61	16	98.3607	90.9091	98.4848	26.2295	9	2	61	32	31	27	43	33	22.2222	52.459	87.0968	76.7442		16.265	3	0.001001
19	44	43	6	2	28	28	13	11	97.7273	33.3333	100	84.6154	34	25	21	5	62	46	55	53	73.5294	23.8095	74.1935	96.3636
20	54	51	8	7	59	57	58	56	94.4444	87.5	96.6102	96.5517	63	51	7	5	28	28	52	42	80.9524	71.4286	100	80.7692
