# Supplementary material for: Tritrophic metabolism of plant chemical defenses and its effects on herbivore and predator performance
Source: eLife. 2019 Dec 16;8:e51029. doi: 10.7554/eLife.51029 (PMC6934381; doi:10.7554/eLife.51029)
Supplement: Figure 3—figure supplement 1—source data 1. [file elife-51029-fig3-figsupp1-data1.xlsx]

## Sheet: Figure 3 - figure supplement 1
Figure 3 - figure supplement 1										Tukey HSD tests in conjuction with a two-way ANOVA
Frass spiking with 4MSOB										Source	Type III Sum of Squares	df	Mean Square	F	Sig.
	4MSOB		Desulfo-4MSOB		4MSOB-ITC					Corrected Model	22644.6	5	4528.92	849.38	2.38836e-31
#	fresh frass	heat-inactivated frass	fresh frass	heat-inactivated frass	fresh frass	heat-inactivated frass				Intercept	13368	1	13368	2507.1	1.79443e-30
1	0.156843	53.9941	55.0384	0.0216648	6.29227	0.0115636				Metabolites	4865.44	2	2432.72	456.246	3.48858e-23
2	0.166854	59.6671	48.0271	0.0256963	5.42761	0.0208353				Treatments	1.91291	1	1.91291	0.358759	0.553693
3	0.129479	58.933	48.3777	0.0294473	5.81306	0.00905296				Metabolites * Treatments	17777.2	2	8888.62	1667.02	1.79426e-31
4	0.313019	58.2656	46.6249	0.0297979	5.82348	0.850082				Residuals	159.961	30	5.33203
5	2.12906	65.6071	53.2856	0.0345305	5.6568	0.0211479				Total	36172.5	36
6	0.76753	53.4601	52.5845	0.0197718	6.09434	0.00912588				Corrected Total	22804.6	35
Average	0.610465	58.3212	50.6564	0.0268181	5.85126	0.153635
STDEV	0.781433	4.41877	3.41147	0.00552699	0.307607	0.341233
StdEr	0.319019	1.80396	1.39273	0.00225638	0.12558	0.139308
