# Supplementary material for: Tritrophic metabolism of plant chemical defenses and its effects on herbivore and predator performance
Source: eLife. 2019 Dec 16;8:e51029. doi: 10.7554/eLife.51029 (PMC6934381; doi:10.7554/eLife.51029)
Supplement: Figure 3—figure supplement 2—source data 1. [file elife-51029-fig3-figsupp2-data1.xlsx]

## Sheet: Figure 3 - figure supplement 2
Figure 3 - figure supplement 2B
I3M
	Midgut epithelium				Hemolymph				Integument+fat body				Frass				Pupal excretion				Pupa				Female				Male				Eggs
	Col-0	Col-0	myb28myb29	myb28myb29	Col-0	Col-0	myb28myb29	myb28myb29	Col-0	Col-0	myb28myb29	myb28myb29	Col-0	Col-0	myb28myb29	myb28myb29	Col-0	Col-0	myb28myb29	myb28myb29	Col-0	Col-0	myb28myb29	myb28myb29	Col-0	Col-0	myb28myb29	myb28myb29	Col-0	Col-0	myb28myb29	myb28myb29	Col-0	Col-0	myb28myb29	myb28myb29
#	EV control	gss1 RNAi	EV control	gss1 RNAi	EV control	gss1 RNAi	EV control	gss1 RNAi	EV control	gss1 RNAi	EV control	gss1 RNAi	EV control	gss1 RNAi	EV control	gss1 RNAi	EV control	gss1 RNAi	EV control	gss1 RNAi	EV control	gss1 RNAi	EV control	gss1 RNAi	EV control	gss1 RNAi	EV control	gss1 RNAi	EV control	gss1 RNAi	EV control	gss1 RNAi	EV control	gss1 RNAi	EV control	gss1 RNAi
1	0.209496	99.2185	1.78214	57.8248	0.0969013	13.2713	1.20284	34.5474	0.00200649	0.00240147	0.00559289	0.0111858	2.22276	11.466	1.87354	18.1584	0.00319516	0.0066559	0.0012134	0.00464565	0.00905368	1.74141	0.0389307	9.78668	0.0173342	9.10106	1.30545	13.303	0.569068	0.699686	0.00938714	14.9069	0.00305777	0.00916123	0.00306986	0.00610346
2	0.0127973	34.1261	0.549809	66.6723	0.286491	19.1064	0.505572	32.0195	0.0227507	0.00279644	0.00279644	0.00480293	1.40926	10.4785	0.926528	26.5581	0.0049372	0.00161275	0.00316569	0.00336759	0.0030788	3.82971	0.0053085	0.84262	0.00780013	5.89811	0.644862	12.6706	1.46354	8.58224	0.00481243	8.67179	0.00305777	0.00610346	0.00305777	0.00305777
3	0.029576	33.4941	6.13006	60.0367	0.246466	12.4286	0.109751	32.4409	0.00439216	0.00200649	0.00399718	0.00559289	4.9343	8.49969	44.346	22.1742	0.00484847	0.00343956	0.00221899	0.0033368	0.0023172	3.78319	0.0130692	8.24692	1.14739	5.46055	1.76697	10.1349	3.68679	0.802718	0.00312355	17.9102	0.00610346	0.00611554	0.00305777	0.00305777
4	0.379179	0.00398138	0.3539	0.0072044	0.00693055	20.3493	0.123654	32.8622	0.000799435	0.00399718	0.0071886	0.00319142	2.06437	10.5498	15.9652	20.4145	0.00323574	0.00313641	0.0212703	0.00349568	0.0615112	3.19646	0.00217104	9.47947	0.251699	3.44862	0.00515535	12.8851	2.0836	5.39881	0.00745576	11.8048	0.00611554	0.00305777	0.00611554	0.00305777
5	0.565608	0.00562449	0.0151672	0.00319142	0.275958	17.2948	3.6654	33.9154	0.00320722	0.00240147	0.0072044	0.00200649	2.59909	11.512	4.07474	22.1072	0.00326388	0.00155375	0.0100907	0	0.0032716	3.43459	0.0022679	6.15443	0.599529	1.22392	0.731616	14.8604	1.20417	5.98577	0.163017	20.5308	0.00611554	0	0.00611554	0.00305777
Average	0.239331	33.3697	1.76622	36.9088	0.182549	16.4901	1.12144	33.1571	0.00663121	0.00272061	0.0053559	0.0053559	2.64595	10.5012	13.4372	21.8825	0.00389609	0.00327967	0.00759183	0.00296914	0.0158465	3.19707	0.0123495	6.90202	0.404751	5.02645	0.890811	12.7708	1.80143	4.29384	0.0375592	14.7649	0.00489002	0.0048876	0.0042833	0.00366691
StDEV	0.235701	40.5064	2.52902	33.8452	0.12429	3.50863	1.48969	1.04905	0.00911007	0.000766331	0.00195121	0.00354446	1.34958	1.2208	18.3005	3.08303	0.000910768	0.00207379	0.00840369	0.00174626	0.025669	0.854271	0.0155072	3.67588	0.479724	2.93681	0.672644	1.70443	1.18573	3.44891	0.0701743	4.71824	0.00167261	0.00348163	0.00167261	0.00136207
StdEr	0.105409	18.115	1.13101	15.136	0.0555841	1.56911	0.66621	0.469151	0.00407415	0.000342713	0.000872606	0.00158513	0.60355	0.545959	8.18424	1.37877	0.000407308	0.000927427	0.00375824	0.00078095	0.0114795	0.382042	0.00693502	1.64391	0.214539	1.31338	0.300816	0.762245	0.530273	1.5424	0.0313829	2.11006	0.000748014	0.00155703	0.000748014	0.000609137
Figure 3 - figure supplement 2C
Desulfo-I3M
	Midgut epithelium				Hemolymph				Integument+fat body				Frass				Pupal excretion				Pupa				Female				Male				Eggs
	Col-0	Col-0	myb28myb29	myb28myb29	Col-0	Col-0	myb28myb29	myb28myb29	Col-0	Col-0	myb28myb29	myb28myb29	Col-0	Col-0	myb28myb29	myb28myb29	Col-0	Col-0	myb28myb29	myb28myb29	Col-0	Col-0	myb28myb29	myb28myb29	Col-0	Col-0	myb28myb29	myb28myb29	Col-0	Col-0	myb28myb29	myb28myb29	Col-0	Col-0	myb28myb29	myb28myb29
#	EV control	gss1 RNAi	EV control	gss1 RNAi	EV control	gss1 RNAi	EV control	gss1 RNAi	EV control	gss1 RNAi	EV control	gss1 RNAi	EV control	gss1 RNAi	EV control	gss1 RNAi	EV control	gss1 RNAi	EV control	gss1 RNAi	EV control	gss1 RNAi	EV control	gss1 RNAi	EV control	gss1 RNAi	EV control	gss1 RNAi	EV control	gss1 RNAi	EV control	gss1 RNAi	EV control	gss1 RNAi	EV control	gss1 RNAi
1	61.8356	3.24609	66.0647	13.9445	51.8916	4.06904	68.5793	36.728	5.07487	5.37204	16.8591	19.4308	88.1608	75.958	74.3476	110.098	72.7087	15.0074	49.7016	14.2317	0.0481514	0.0457195	20.9548	0.0866766	0.648278	0.163256	0.124259	0.180663	0.355717	0.0479632	0.0667944	0.189641	0.0912301	0.031312	0.031312	0.0456923
2	69.2651	2.62887	133.73	11.3499	65.2265	6.89603	109.727	47.8531	8.80101	11.5442	18.9164	24.3456	106.168	79.8651	79.7076	204.037	47.8529	5.09715	30.6768	16.6888	1.90498	0.239265	0.810759	0.833327	0.627414	0.0905689	0.0839393	0.106257	0.506466	1.18156	0.136185	0.0638809	0.0625467	0.0312347	0.031312	0.0457697
3	96.9254	1.85164	146.302	8.12664	55.0158	8.15331	80.0091	24.9171	7.60087	8.28666	22.8598	19.145	109.953	53.2845	211.941	80.9133	50.6707	3.19169	13.4654	18.6981	0.0856413	0.161729	4.02767	0.881965	0.495371	0.134255	0.169006	0.032628	0.345575	0.15533	0.0509329	0.0886418	0.0457697	0.0623921	0.0456923	0.0456923
4	73.0369	18.745	79.3234	31.8894	57.5304	5.22726	52.044	81.5331	10.4583	7.88662	7.20082	22.174	84.3089	59.7037	107.461	128.183	78.5408	4.88673	13.246	19.1291	0.0271269	0.554929	0.0729335	0.11635	0.521104	0.250511	0.0814244	0.0346627	0.215815	0.0725707	0.0869013	0.0434372	0.0627013	0.0623921	0.0625467	0.0457697
5	109.498	19.0879	93.0392	33.4895	56.235	11.0489	110.489	39.014	16.4019	18.0021	23.1455	20.4595	82.0135	70.028	186.266	88.2838	53.334	13.2392	36.2863	16.6707	0.0807089	0.405843	0.0288584	0.0886002	23.54	0.107268	0.0540239	0.109241	0.328028	0.391695	0.130645	0.0572461	0.125248	0.0625467	0.0623921	0.031544
Average	82.1122	9.1119	103.692	19.76	57.1799	7.0789	84.1696	46.0091	9.66739	10.2183	17.7963	21.111	94.121	67.7679	131.945	122.303	60.6214	8.28444	28.6752	17.0837	0.429322	0.281497	5.179	0.401384	5.16643	0.149172	0.10253	0.0926903	0.35032	0.369823	0.0942917	0.0885694	0.0774992	0.0499755	0.046651	0.0428936
StDEV	20.1741	8.96474	34.7888	11.9949	4.96015	2.71277	25.6822	21.4785	4.24533	4.87337	6.49326	2.16248	12.9826	11.1055	63.2375	49.3314	13.9854	5.41727	15.6	1.95261	0.825267	0.201213	8.97048	0.417029	10.2713	0.0630094	0.0448194	0.061587	0.103708	0.473643	0.0379714	0.0588283	0.0312962	0.0170728	0.015588	0.00634476
StdEr	9.02212	4.00915	15.558	5.36427	2.21825	1.21319	11.4854	9.60546	1.89857	2.17944	2.90388	0.967092	5.80601	4.96653	28.2807	22.0617	6.25447	2.42268	6.97655	0.873234	0.369071	0.089985	4.01172	0.186501	4.59349	0.0281787	0.0200439	0.0275425	0.0463798	0.21182	0.0169813	0.0263088	0.0139961	0.00763519	0.00697117	0.00283746
Figure 3 - figure supplement 2D
I3C-ascorbate
	Midgut epithelium				Hemolymph				Integument+fat body				Frass				Pupal excretion				Pupa				Female				Male				Eggs
	Col-0	Col-0	myb28myb29	myb28myb29	Col-0	Col-0	myb28myb29	myb28myb29	Col-0	Col-0	myb28myb29	myb28myb29	Col-0	Col-0	myb28myb29	myb28myb29	Col-0	Col-0	myb28myb29	myb28myb29	Col-0	Col-0	myb28myb29	myb28myb29	Col-0	Col-0	myb28myb29	myb28myb29	Col-0	Col-0	myb28myb29	myb28myb29	Col-0	Col-0	myb28myb29	myb28myb29
#	EV control	gss1 RNAi	EV control	gss1 RNAi	EV control	gss1 RNAi	EV control	gss1 RNAi	EV control	gss1 RNAi	EV control	gss1 RNAi	EV control	gss1 RNAi	EV control	gss1 RNAi	EV control	gss1 RNAi	EV control	gss1 RNAi	EV control	gss1 RNAi	EV control	gss1 RNAi	EV control	gss1 RNAi	EV control	gss1 RNAi	EV control	gss1 RNAi	EV control	gss1 RNAi	EV control	gss1 RNAi	EV control	gss1 RNAi
1	0.152978	78.9356	1.02765	32.7657	0.0939	23.5459	0.432621	25.5317	0.0213828	0.00306381	0.00611698	0.00918079	0.083105	2.86155	0.034466	2.60839	0.00340205	0.0177522	0.00774283	0.05274	0.00869165	5.7998	0.321874	11.7611	0.0284543	26.1969	0.00864018	17.6636	1.48902	0.0290546	0.0478216	25.0086	0.00651152	0.0195119	0.00651152	0.00651152
2	0.165318	36.8082	1.01489	45.3188	0.167375	27.5175	0.721981	28.0849	0.00611698	0.00306381	0.015319	0.00306381	0.0752737	1.82787	0.0202115	4.63684	0.006997	0.0206299	0.00674296	0.0751988	0.00785592	14.468	0.0163403	0.860112	0.0198684	21.1421	0.00947374	19.1084	3.20187	26.2672	0.049162	15.9829	0.013023	0.0130004	0.00651152	0.0130004
3	0.201913	48.5103	2.42551	43.8295	0.143261	18.1559	0.550351	34.7515	0.00918079	0.00612762	0.0306381	0.00918079	0.17804	1.36625	0.640521	3.41838	0.00687126	0.0366227	0.00943427	0.0847854	0.0088806	15.3422	0.0500793	10.3213	3.29685	20.999	2.53669	15.1841	6.75443	2.68678	0.0119238	27.733	0.00651152	0.00651152	0.00648891	0.013023
4	0.13468	35.1061	0.58723	33.6168	0.143261	32.3402	0.313473	18.4396	0.00306381	0.00611698	0.0520209	0.0580847	0.107466	3.3914	0.0526815	2.63249	0.0103238	0.0400835	0.0151784	0.0819689	0.0244537	16.1269	0.0249817	12.8477	0.819944	16.9053	0.0197625	20.1591	3.5847	20.9463	0.0800855	17.3592	0.00651152	0.013023	0.00651152	0.0391143
5	0.299998	20.085	0.599996	34.4678	0.191488	30.9218	0.787228	25.3899	0.015319	0.0184041	0.015319	0.015319	0.107115	1.81566	0.385926	3.56066	0	0.0297553	0.00614294	0.0644133	0.0249817	10.8541	0.0173531	9.84557	1.80797	4.06614	1.7293	20.9088	2.16885	0.038887	0.357226	26.0645	0.00651152	0.013023	0.00651152	0.0195119
Average	0.190977	43.8891	1.13106	37.9997	0.147857	26.4963	0.561131	26.4395	0.0110127	0.00735527	0.0238828	0.0189658	0.1102	2.25255	0.226761	3.37135	0.00551882	0.0289687	0.00904827	0.0718213	0.0149727	12.5182	0.0861258	9.12717	1.19462	17.8619	0.860772	18.6048	3.43977	9.99365	0.109244	22.4296	0.00781382	0.013014	0.00650699	0.0182322
StDEV	0.0657207	22.0427	0.754583	6.05463	0.0361877	5.76727	0.196824	5.86774	0.00735855	0.006363	0.0180256	0.0222932	0.0405377	0.840326	0.276801	0.831796	0.00393827	0.00972222	0.00364646	0.0132422	0.00890624	4.26338	0.132491	4.77144	1.38527	8.38616	1.19595	2.26746	2.0301	12.6152	0.140711	5.36792	0.00291204	0.00459635	1.01112e-05	0.0125457
StdEr	0.0293912	9.85781	0.33746	2.70771	0.0161836	2.5792	0.0880222	2.62413	0.00329084	0.00284562	0.00806129	0.00996984	0.018129	0.375805	0.123789	0.371991	0.00176125	0.00434791	0.00163074	0.00592208	0.00398299	1.90664	0.0592516	2.13385	0.619514	3.75041	0.534844	1.01404	0.907888	5.64168	0.0629281	2.40061	0.0013023	0.00205555	4.52189e-06	0.00561062
Tukey HSD tests in conjuction with a one-way ANOVA
	I3M							Desulfo-I3M							I3C-ascorbate
Midgut epithelium		Sum of Squares	df	Mean Square	F	Sig.	Midgut epithelium		Sum of Squares	df	Mean Square	F	Sig.	Midgut epitheium		Sum of Squares	df	Mean Square	F	Sig.
	Between Groups	42334.5	3	14111.5	17.0953	0.000124722		Between Groups	49173.7	3	16391.2	23.3378	4.37227e-06		Between Groups	2884.48	3	961.493	20.9073	8.79926e-06
	Residuals	9905.52	12	825.46				Residuals	11237.6	16	702.347				Residuals	735.815	16	45.9885
	Total	52240	15					Total	60411.3	19					Total	3620.29	19
Hemolymph		Sum of Squares	df	Mean Square	F	Sig.	Hemolymph		Sum of Squares	df	Mean Square	F	Sig.	Hemolymph		Sum of Squares	df	Mean Square	F	Sig.
	Between Groups	3618	3	1206	308.329	2.31491e-14		Between Groups	23414.4	3	7804.8	17.7502	2.41632e-05		Between Groups	1199.12	3	399.708	67.1271	2.77992e-09
	Residuals	62.5826	16	3.91141				Residuals	7035.22	16	439.702				Residuals	95.2719	16	5.9545
	Total	3680.59	19					Total	30449.6	19					Total	1294.4	19
Integument+fat body		Sum of Squares	df	Mean Square	F	Sig.	Integument+fat body		Sum of Squares	df	Mean Square	F	Sig.	Integument+fat body		Sum of Squares	df	Mean Square	F	Sig.
	Between Groups	4.05439e-05	3	1.35146e-05	0.54085	0.661174		Between Groups	733.057	3	244.352	7.23012	0.00277684		Between Groups	0.000296447	3	9.88155e-05	1.22636	0.332547
	Residuals	0.000399805	16	2.49878e-05				Residuals	540.743	16	33.7964				Residuals	0.00128922	16	8.05761e-05
	Total	0.000440348	19					Total	1273.8	19					Total	0.00158566	19
Frass		Sum of Squares	df	Mean Square	F	Sig.	Frass		Sum of Squares	df	Mean Square	F	Sig.	Frass		Sum of Squares	df	Mean Square	F	Sig.
	Between Groups	947.096	3	315.699	3.63158	0.0358895		Between Groups	19270.5	3	6423.48	2.50457	0.0961313		Between Groups	13.3989	3	4.46631	34.4131	3.29277e-07
	Residuals	1390.9	16	86.9314				Residuals	41035.3	16	2564.71				Residuals	2.07656	16	0.129785
	Total	2338	19					Total	60305.8	19					Total	15.4755	19
Pupal excretion		Sum of Squares	df	Mean Square	F	Sig.	Pupal excretion		Sum of Squares	df	Mean Square	F	Sig.	Pupal excretion		Sum of Squares	df	Mean Square	F	Sig.
	Between Groups	6.88998e-05	3	2.29666e-05	1.16238	0.354786		Between Groups	7855.23	3	2618.41	22.2179	5.9893e-06		Between Groups	0.0139152	3	0.00463841	61.9959	4.98944e-09
	Residuals	0.000316133	16	1.97583e-05				Residuals	1885.62	16	117.851				Residuals	0.00119709	16	7.48181e-05
	Total	0.000385033	19					Total	9740.85	19					Total	0.0151123	19
Pupa		Sum of Squares	df	Mean Square	F	Sig.	Pupa		Sum of Squares	df	Mean Square	F	Sig.	Pupa		Sum of Squares	df	Mean Square	F	Sig.
	Between Groups	161.095	3	53.6985	15.0809	6.34793e-05		Between Groups	86.7595	3	28.9198	1.42173	0.273149		Between Groups	608.889	3	202.963	19.8988	1.19861e-05
	Residuals	56.9712	16	3.5607				Residuals	325.46	16	20.3412				Residuals	163.196	16	10.1998
	Total	218.067	19					Total	412.219	19					Total	772.085	19
Female		Sum of Squares	df	Mean Square	F	Sig.	Female		Sum of Squares	df	Mean Square	F	Sig.	Female		Sum of Squares	df	Mean Square	F	Sig.
	Between Groups	490.911	3	163.637	53.5964	1.44093e-08		Between Groups	95.7055	3	31.9018	1.20943	0.338289		Between Groups	1482.39	3	494.129	25.1073	2.7235e-06
	Residuals	48.8501	16	3.05313				Residuals	422.042	16	26.3776				Residuals	314.891	16	19.6807
	Total	539.761	19					Total	517.747	19					Total	1797.28	19
Male		Sum of Squares	df	Mean Square	F	Sig.	Male		Sum of Squares	df	Mean Square	F	Sig.	Male		Sum of Squares	df	Mean Square	F	Sig.
	Between Groups	652.537	3	217.512	24.4618	3.22639e-06		Between Groups	0.361873	3	0.120624	2.01044	0.153082		Between Groups	1457.99	3	485.998	10.1303	0.000556447
	Residuals	142.27	16	8.8919				Residuals	0.959984	16	0.059999				Residuals	767.598	16	47.9749
	Total	794.807	19					Total	1.32186	19					Total	2225.59	19
Eggs		Sum of Squares	df	Mean Square	F	Sig.	Eggs		Sum of Squares	df	Mean Square	F	Sig.	Eggs		Sum of Squares	df	Mean Square	F	Sig.
	Between Groups	5.12269e-06	3	1.70756e-06	0.349089	0.790328		Between Groups	0.00371457	3	0.00123819	3.19861	0.0517648		Between Groups	0.000429794	3	0.000143265	3.06736	0.0580157
	Residuals	7.82638e-05	16	4.89149e-06				Residuals	0.00619364	16	0.000387102				Residuals	0.0007473	16	4.67063e-05
	Total	8.33865e-05	19					Total	0.00990821	19					Total	0.00117709	19
