# Supplementary material for: Tritrophic metabolism of plant chemical defenses and its effects on herbivore and predator performance
Source: eLife. 2019 Dec 16;8:e51029. doi: 10.7554/eLife.51029 (PMC6934381; doi:10.7554/eLife.51029)
Supplement: Figure 3—source data 1. [file elife-51029-fig3-data1.xlsx]

## Sheet: Figure 3
Figure 3A
4MSOB
	Midgut epithelium				Hemolymph				Integument+fat body				Frass				Pupal excretion				Pupa				Female				Male				Eggs
	Col-0	Col-0	myb28myb29	myb28myb29	Col-0	Col-0	myb28myb29	myb28myb29	Col-0	Col-0	myb28myb29	myb28myb29	Col-0	Col-0	myb28myb29	myb28myb29	Col-0	Col-0	myb28myb29	myb28myb29	Col-0	Col-0	myb28myb29	myb28myb29	Col-0	Col-0	myb28myb29	myb28myb29	Col-0	Col-0	myb28myb29	myb28myb29	Col-0	Col-0	myb28myb29	myb28myb29
#	EV control	gss1 RNAi	EV control	gss1 RNAi	EV control	gss1 RNAi	EV control	gss1 RNAi	EV control	gss1 RNAi	EV control	gss1 RNAi	EV control	gss1 RNAi	EV control	gss1 RNAi	EV control	gss1 RNAi	EV control	gss1 RNAi	EV control	gss1 RNAi	EV control	gss1 RNAi	EV control	gss1 RNAi	EV control	gss1 RNAi	EV control	gss1 RNAi	EV control	gss1 RNAi	EV control	gss1 RNAi	EV control	gss1 RNAi
1	5.53761	153.192	5.78726	4.15321	0.77466	102.582	0.686906	0.343453	1.15745	0.762556	0.340427	0.445959	11.2313	66.4335	1.31442	0.2124	0.0061904	0.0563832	0.0105366	0.00899896	0.81123	15.9706	0.826335	0.321514	12.4501	47.7832	1.95526	1.74668	10.3373	23.2977	2.54164	2.04608	0.017746	0.0325565	0.0472336	0.0442982
2	5.96882	167.717	5.28796	3.17732	2.1636	116.804	0.590073	0.381278	0.946387	0.725109	0.382413	0.447094	1.87557	61.4822	2.61701	0.258273	0.00478991	0.0171711	0.0137719	0.171194	0.532462	35.707	0.656646	0.305821	8.77213	52.7455	2.43864	1.65991	10.5865	48.9664	2.0748	1.43208	0.017746	0.0649795	0.0739192	0.0296211
3	7.35322	157.958	5.08371	2.58724	0.783738	76.5582	0.66875	0.349505	0.848798	0.595747	0.250781	0.500427	13.7723	67.0153	0.805353	0.276616	0.00937947	0.0116318	0.0214957	0.108773	0.516396	33.0392	0.487868	0.312259	10.7855	51.1008	2.22008	1.31028	10.6669	18.6397	1.9564	1.47679	0.0118751	0.0797901	0.0294876	0.0265522
4	8.87379	164.767	4.24399	2.12426	2.0123	121.797	0.320758	0.257211	0.832911	0.788655	0.478867	0.509505	1.76969	59.2737	0.558684	0.30155	0.00938939	0.0182384	0.0206829	0.09476	0.43272	28.6814	0.379796	0.334608	9.52707	33.5324	2.30599	1.25987	8.70418	44.727	1.90826	1.24257	0.0118351	0.017746	0.0206814	0.0354919
5	7.73904	183.604	4.69789	2.90498	0.933526	103.187	0.304115	0.260237	0.69674	0.309788	0.726244	0.511775	2.39635	60.709	0.516182	0.266755	0.00632179	0.0555951	0.0153568	0.0138988	0.67931	30.4246	0.354108	0.353035	8.4649	48.0197	2.08378	1.40781	6.70173	95.6303	2.1969	1.2954	0.0118217	0.0325565	0.017746	0.0296211
Average	7.09449	165.447	5.02016	2.9894	1.33357	104.186	0.51412	0.318337	0.896457	0.636371	0.435746	0.482952	6.20904	62.9828	1.16233	0.263119	0.00721419	0.0318039	0.0163688	0.0795249	0.594424	28.7646	0.540951	0.325447	9.99995	46.6363	2.20075	1.47691	9.39933	46.2522	2.1356	1.49858	0.0142048	0.0455257	0.0378136	0.0331169
StDEV	1.35456	11.6355	0.585341	0.759454	0.693606	17.5801	0.187767	0.0562933	0.170885	0.197037	0.181928	0.0335243	5.81914	3.51238	0.873007	0.032666	0.00207012	0.0222217	0.00465509	0.0685044	0.150238	7.6308	0.199078	0.0188388	1.63616	7.619	0.188405	0.215589	1.70707	30.5665	0.253041	0.320731	0.0032327	0.0257906	0.0232266	0.00703914
StdEr	0.605777	5.20357	0.261772	0.339638	0.31019	7.86205	0.0839718	0.0251751	0.0764223	0.0881176	0.0813605	0.0149925	2.6024	1.57079	0.390421	0.0146087	0.000925785	0.00993785	0.00208182	0.0306361	0.0671885	3.4126	0.0890304	0.00842497	0.731712	3.40732	0.0842571	0.0964144	0.763425	13.6698	0.113164	0.143435	0.00144571	0.0115339	0.0103872	0.003148
Figure 3B
Desulfo-4MSOB
	Midgut epithelium				Hemolymph				Integument+fat body				Frass				Pupal excretion				Pupa				Female				Male				Eggs
	Col-0	Col-0	myb28myb29	myb28myb29	Col-0	Col-0	myb28myb29	myb28myb29	Col-0	Col-0	myb28myb29	myb28myb29	Col-0	Col-0	myb28myb29	myb28myb29	Col-0	Col-0	myb28myb29	myb28myb29	Col-0	Col-0	myb28myb29	myb28myb29	Col-0	Col-0	myb28myb29	myb28myb29	Col-0	Col-0	myb28myb29	myb28myb29	Col-0	Col-0	myb28myb29	myb28myb29
#	EV control	gss1 RNAi	EV control	gss1 RNAi	EV control	gss1 RNAi	EV control	gss1 RNAi	EV control	gss1 RNAi	EV control	gss1 RNAi	EV control	gss1 RNAi	EV control	gss1 RNAi	EV control	gss1 RNAi	EV control	gss1 RNAi	EV control	gss1 RNAi	EV control	gss1 RNAi	EV control	gss1 RNAi	EV control	gss1 RNAi	EV control	gss1 RNAi	EV control	gss1 RNAi	EV control	gss1 RNAi	EV control	gss1 RNAi
1	253.851	31.4505	5.84082	1.32317	157.253	30.7017	4.50791	4.52289	47.1758	45.0417	3.90885	1.21309	590.519	409.957	25.4314	8.7171	499.949	241.744	0.0385837	0.0727433	8.53976	5.55793	1.70213	0.970349	1.30548	3.43195	2.67663	1.84177	4.46038	5.10222	3.08662	2.77974	9.53479	1.11952	0.183164	0.101853
2	271.823	28.9794	6.043	0.988446	248.609	49.2725	4.52289	6.40992	64.3613	81.4344	11.457	1.53883	546.216	422.017	33.6757	2.94082	482.771	143.554	0.109208	0.0686233	42.9133	6.05049	6.55968	1.97562	1.67824	3.66703	2.26105	2.14576	2.94816	3.36166	3.80956	2.94759	2.85872	0.849058	0.0879871	0.121367
3	417.843	23.1386	3.90885	1.11649	209.67	173.727	17.6722	0.861146	61.2162	102.439	11.6816	1.23556	528.424	487.288	17.3157	3.20825	558.239	126.123	0.157765	0.0733102	3.51621	17.9412	1.20729	1.30327	1.89461	5.60616	2.63095	2.22287	3.62461	4.2497	2.32122	2.68454	0.552915	10.0483	1.53036	0.503272
4	359.435	34.5956	5.84082	0.314505	242.618	46.427	14.6619	2.65083	67.0571	62.7888	9.74967	0.463896	552.345	326.627	21.7658	6.35315	706.462	132.828	0.133673	0.053923	6.70945	15.0416	1.43957	0.884187	2.27642	6.4679	2.56563	3.11384	3.37693	3.96155	2.2044	2.64801	41.2546	8.59329	0.116232	0.118286
5	471.758	45.8279	11.9512	0.687419	182.713	33.2477	2.50107	3.45956	84.2425	83.9056	0.554877	1.4939	501.923	388.328	14.2618	3.47032	540.09	216.586	0.0683917	0.0763182	4.21786	34.5109	1.25866	0.972001	30.0185	4.67655	2.81952	1.76839	4.83706	3.88779	3.63661	2.84831	6.60759	0.155946	0.14054	0.115547
Average	354.942	32.7984	6.71694	0.886007	208.173	66.6752	8.7732	3.58087	64.8106	75.1219	7.4704	1.18906	543.886	406.843	22.4901	4.93793	557.502	172.167	0.101524	0.0689836	13.1793	15.8204	2.43347	1.22108	7.43464	4.76992	2.59076	2.21853	3.84943	4.11258	3.01168	2.78164	12.1617	4.15323	0.411656	0.192065
StDEV	93.2081	8.40701	3.05255	0.393948	38.9388	60.3829	6.88235	2.07168	13.2924	21.9097	4.98326	0.43124	32.602	58.0706	7.56264	2.52087	88.5857	53.1515	0.0482568	0.00885441	16.742	11.7815	2.31474	0.451244	12.6296	1.2843	0.206553	0.53653	0.780185	0.639416	0.735052	0.12173	16.6242	4.7583	0.626348	0.17413
StdEr	41.6839	3.75973	1.36514	0.176179	17.4139	27.0041	3.07788	0.926486	5.94455	9.79833	2.22858	0.192856	14.5801	25.97	3.38212	1.12737	39.6167	23.7701	0.0215811	0.00395981	7.48725	5.26883	1.03518	0.201802	5.64815	0.574356	0.0923732	0.239944	0.348909	0.285956	0.328725	0.0544391	7.43457	2.12797	0.280111	0.0778732
Figure 3B
4MSOB-ITC
	Midgut epithelium				Hemolymph				Integument+fat body				Frass				Pupal excretion				Pupa				Female				Male				Eggs
	Col-0	Col-0	myb28myb29	myb28myb29	Col-0	Col-0	myb28myb29	myb28myb29	Col-0	Col-0	myb28myb29	myb28myb29	Col-0	Col-0	myb28myb29	myb28myb29	Col-0	Col-0	myb28myb29	myb28myb29	Col-0	Col-0	myb28myb29	myb28myb29	Col-0	Col-0	myb28myb29	myb28myb29	Col-0	Col-0	myb28myb29	myb28myb29	Col-0	Col-0	myb28myb29	myb28myb29
#	EV control	gss1 RNAi	EV control	gss1 RNAi	EV control	gss1 RNAi	EV control	gss1 RNAi	EV control	gss1 RNAi	EV control	gss1 RNAi	EV control	gss1 RNAi	EV control	gss1 RNAi	EV control	gss1 RNAi	EV control	gss1 RNAi	EV control	gss1 RNAi	EV control	gss1 RNAi	EV control	gss1 RNAi	EV control	gss1 RNAi	EV control	gss1 RNAi	EV control	gss1 RNAi	EV control	gss1 RNAi	EV control	gss1 RNAi
1	24.9335	458.254	1.82804	1.38036	14.5497	318.353	1.26015	0.874642	10.1973	9.97963	0.40105	0.120315	167.666	488.638	2.40337	1.15022	0.931667	8.42418	0.0783247	0.094223	0.345729	118.83	4.52786	0.254759	3.76751	431.489	3.70861	1.91968	2.35583	219.644	4.3263	1.1373	0.735064	0.809932	0.609831	0.514545
2	23.4412	473.177	1.69747	1.22491	32.0011	356.904	1.07776	0.845626	19.8971	19.5551	1.57311	0.138969	129.525	438.026	2.0861	0.878715	1.96345	13.6769	0.0974324	0.112062	0.85296	249.542	0.969982	0.263707	2.76685	411.905	3.50883	1.53146	1.76245	405.615	3.89786	0.969046	0.769095	0.657474	0.588732	0.497529
3	50.9241	499.914	1.41145	1.23735	33.0374	258.662	1.18968	0.733705	18.0006	9.82418	1.2902	0.172234	242.945	424.426	1.12131	0.876506	1.24827	12.862	0.138296	0.363611	0.238801	243.638	0.357843	0.254887	2.39308	404.839	3.54261	1.42595	1.64297	170.226	3.08532	1.09038	0.755482	0.775901	0.645903	0.528157
4	47.5043	440.845	1.33683	0.963765	43.1103	361.464	1.04874	0.654945	11.5341	8.39408	1.12232	0.101662	185.64	532.383	1.1781	1.46663	1.95182	12.661	0.231631	0.545739	0.462607	221.679	0.275784	0.27502	2.59946	283.102	3.93731	1.37428	1.59087	391.381	2.85275	0.970556	0.707839	1.08218	0.573758	0.51999
5	50.1158	368.096	1.0819	0.994854	20.0214	339.908	0.783447	0.654945	10.3216	11.1921	0.14985	0.152648	114.984	411.563	1.97811	0.904843	1.89262	8.40393	0.0882873	0.436019	0.379838	221.679	0.216081	0.248713	3.46864	403.17	3.45518	1.23675	2.48637	764.614	2.52771	0.656502	0.707839	0.603705	0.588051	0.430149
Average	39.3838	448.057	1.47114	1.16025	28.544	327.058	1.07195	0.752773	13.9901	11.789	0.907307	0.137165	168.152	459.007	1.7534	1.05538	1.59757	11.2056	0.126794	0.310331	0.455987	211.074	1.26951	0.259417	2.99911	386.901	3.63051	1.49763	1.9677	390.296	3.33799	0.964756	0.735064	0.785838	0.601255	0.498074
StDEV	13.9398	49.6739	0.296526	0.176449	11.3225	41.8134	0.182404	0.103655	4.60576	4.45332	0.605428	0.0274646	50.5444	50.3713	0.573181	0.2569	0.477454	2.57657	0.0628834	0.200042	0.235985	53.0899	1.84627	0.0102303	0.589881	59.1057	0.195895	0.258689	0.421082	233.4	0.749341	0.187499	0.0276467	0.18584	0.0280814	0.039594
StdEr	6.23406	22.2148	0.132611	0.0789102	5.06357	18.6995	0.0815735	0.0463561	2.05976	1.99159	0.270756	0.0122825	22.6041	22.5267	0.256334	0.114889	0.213524	1.15228	0.0281223	0.0894613	0.105536	23.7425	0.825679	0.00457511	0.263803	26.4329	0.0876069	0.115689	0.188313	104.38	0.335115	0.0838521	0.012364	0.0831102	0.0125584	0.017707
Tukey HSD tests in conjuction with a one-way ANOVA
	4MSOB							Desulfo-4MSOB							4MSOB-ITC
Midgut epithelium		Sum of Squares	df	Mean Square	F	Sig.	Midgut epithelium		Sum of Squares	df	Mean Square	F	Sig.	Midgut epitheium		Sum of Squares	df	Mean Square	F	Sig.
	Between Groups	96538.1	3	32179.4	931.79	3.66491e-18		Between Groups	440156	3	146719	66.9345	2.83948e-09		Between Groups	711336	3	237112	356.301	7.4219e-15
	Residuals	552.56	16	34.535				Residuals	35071.6	16	2191.98				Residuals	10647.7	16	665.482
	Total	97090.6	19					Total	475228	19					Total	721983	19
Hemolymph		Sum of Squares	df	Mean Square	F	Sig.	Hemolymph		Sum of Squares	df	Mean Square	F	Sig.	Hemolymph		Sum of Squares	df	Mean Square	F	Sig.
	Between Groups	40145.7	3	13381.9	172.904	2.11682e-12		Between Groups	136250	3	45416.7	34.8422	3.02389e-07		Between Groups	379225	3	126408	269.441	6.66725e-14
	Residuals	1238.32	16	77.3947				Residuals	20855.9	16	1303.5				Residuals	7506.4	16	469.15
	Total	41384	19					Total	157106	19					Total	386731	19
Integument+fat body		Sum of Squares	df	Mean Square	F	Sig.	Integument+fat body		Sum of Squares	df	Mean Square	F	Sig.	Integument+fat body		Sum of Squares	df	Mean Square	F	Sig.
	Between Groups	0.646127	3	0.215376	8.42572	0.00137695		Between Groups	21905.2	3	7301.73	42.8415	7.15275e-08		Between Groups	778.35	3	259.45	25.0601	2.7571e-06
	Residuals	0.408988	16	0.0255617				Residuals	2726.98	16	170.436				Residuals	165.65	16	10.3531
	Total	1.05512	19					Total	24632.2	19					Total	944	19
Frass		Sum of Squares	df	Mean Square	F	Sig.	Frass		Sum of Squares	df	Mean Square	F	Sig.	Frass		Sum of Squares	df	Mean Square	F	Sig.
	Between Groups	13800.5	3	4600.17	391.817	3.50987e-15		Between Groups	1.11333e+06	3	371109	329.974	1.35799e-14		Between Groups	698760	3	232920	182.955	1.36587e-12
	Residuals	187.85	16	11.7406				Residuals	17994.6	16	1124.66				Residuals	20369.6	16	1273.1
	Total	13988.4	19					Total	1.13132e+06	19					Total	719130	19
Pupal excretion		Sum of Squares	df	Mean Square	F	Sig.	Pupal excretion		Sum of Squares	df	Mean Square	F	Sig.	Pupal excretion		Sum of Squares	df	Mean Square	F	Sig.
	Between Groups	0.015532	3	0.00517734	3.97642	0.0270889		Between Groups	1.03601e+06	3	345337	129.825	1.92773e-11		Between Groups	421.891	3	140.63	81.2483	6.72823e-10
	Residuals	0.0208322	16	0.00130201				Residuals	42560.4	16	2660.03				Residuals	27.6939	16	1.73087
	Total	0.0363642	19					Total	1.07857e+06	19					Total	449.585	19
Pupa		Sum of Squares	df	Mean Square	F	Sig.	Pupa		Sum of Squares	df	Mean Square	F	Sig.	Pupa		Sum of Squares	df	Mean Square	F	Sig.
	Between Groups	2998.79	3	999.597	68.5927	2.37007e-09		Between Groups	824.086	3	274.695	2.58745	0.0890929		Between Groups	166028	3	55342.5	78.4442	8.7471e-10
	Residuals	233.167	16	14.5729				Residuals	1698.63	16	106.165				Residuals	11288	16	705.501
	Total	3231.96	19					Total	2522.72	19					Total	177316	19
Female		Sum of Squares	df	Mean Square	F	Sig.	Female		Sum of Squares	df	Mean Square	F	Sig.	Female		Sum of Squares	df	Mean Square	F	Sig.
	Between Groups	6862.64	3	2287.55	150.476	6.19552e-12		Between Groups	86.461	3	28.8203	0.71387	0.557908		Between Groups	553525	3	184508	211.232	4.46701e-13
	Residuals	243.233	16	15.2021				Residuals	645.951	16	40.372				Residuals	13975.8	16	873.486
	Total	7105.87	19					Total	732.412	19					Total	567501	19
Male		Sum of Squares	df	Mean Square	F	Sig.	Male		Sum of Squares	df	Mean Square	F	Sig.	Male		Sum of Squares	df	Mean Square	F	Sig.
	Between Groups	6778.62	3	2259.54	9.6418	0.000714127		Between Groups	6.18444	3	2.06148	5.24329	0.0103566		Between Groups	565153	3	188384	13.8323	0.000104128
	Residuals	3749.57	16	234.348				Residuals	6.29065	16	0.393166				Residuals	217906	16	13619.1
	Total	10528.2	19					Total	12.4751	19					Total	783059	19
Eggs		Sum of Squares	df	Mean Square	F	Sig.	Eggs		Sum of Squares	df	Mean Square	F	Sig.	Eggs		Sum of Squares	df	Mean Square	F	Sig.
	Between Groups	0.00267018	3	0.00089006	2.81524	0.0725061		Between Groups	469.732	3	156.577	2.08817	0.142088		Between Groups	0.254317	3	0.0847723	9.08275	0.000959425
	Residuals	0.00505853	16	0.000316158				Residuals	1199.73	16	74.9829				Residuals	0.149333	16	0.00933332
	Total	0.00772871	19					Total	1669.46	19					Total	0.40365	19
