# Supplementary material for: Tritrophic metabolism of plant chemical defenses and its effects on herbivore and predator performance
Source: eLife. 2019 Dec 16;8:e51029. doi: 10.7554/eLife.51029 (PMC6934381; doi:10.7554/eLife.51029)
Supplement: Figure 4—figure supplement 1—source data 1. [file elife-51029-fig4-figsupp1-data1.xlsx]

## Sheet: Figure 4- figure supplement 1
Figure 4 - figure supplement 1
	4MSOB-ITC			4MSOB-ITC-GSH			4MSOB-ITC-CG			4MSOB-ITC-Cys			4MSOB-ITC-NAC
	Col-0	myb28myb29		Col-0	myb28myb29		Col-0	myb28myb29		Col-0	myb28myb29		Col-0	myb28myb29
#	crushed	solvent	4MSOB-ITC	crushed	solvent	4MSOB-ITC	crushed	solvent	4MSOB-ITC	crushed	solvent	4MSOB-ITC	crushed	solvent	4MSOB-ITC
1	217.799	0.00848244	235.447	7.29084	0	19.0424	0.917018	7.4071e-05	4.16158	1.18113	0.00243586	1.67357	0.0243226	0.00513814	0.0037802
2	281.802	0.0233307	188.132	5.40038	0.000420612	18.0356	0.983404	0.000299574	5.48042	0.441831	0.00230702	1.96601	0.00464579	0.00398206	0.00201199
3	238.815	0.0225375	113.536	12.9041	0.000247419	18.0455	1.74402	0.000118128	3.66496	2.76691	0.00456388	1.31134	0.0558851	0.00480567	0.0037084
4	208.247	0.0254711	299.66	6.64563	0.000287006	37.5768	1.02391	0.000200198	4.82074	0.918659	0.00157998	3.02722	0.020473	0.00104047	0.00488123
5	245.98	0.0332739	255.323	7.33117	0.00076475	36.0083	1.24332	0.000181811	3.42371	1.10458	0.000882826	4.91793	0.0247163	0.0054184	0.00535834
6		0.0334685	181.936		0.000381813	11.5978		0.000181811	2.93376		0.000882826	1.0379		0.0139664	0.00292874
Average	238.529	0.0244274	212.339	7.91443	0.000350267	23.3844	1.18233	0.000175932	4.08086	1.28262	0.00210873	2.32233	0.0260086	0.00572519	0.00377815
StDEV	28.6132	0.00916634	65.2363	2.8964	0.000251001	10.7301	0.337	7.70225e-05	0.941632	0.87814	0.00137545	1.44594	0.018602	0.0043402	0.00122959
StdEr	12.7962	0.00374214	26.6326	1.29531	0.000102471	4.38056	0.150711	3.44455e-05	0.42111	0.392716	0.000561526	0.590303	0.00831905	0.00177188	0.00050198
