# Supplementary material for: Tritrophic metabolism of plant chemical defenses and its effects on herbivore and predator performance
Source: eLife. 2019 Dec 16;8:e51029. doi: 10.7554/eLife.51029 (PMC6934381; doi:10.7554/eLife.51029)
Supplement: Figure 4—source data 1. [file elife-51029-fig4-data1.xlsx]

## Sheet: Figure 4
Figure 4A
4 dph						6 dph						8 dph						Tukey HSD tests in conjuction with a two-way ANOVA
	myb28myb29						myb28myb29						myb28myb29					4 dph
	EV control		gss1 RNAi				EV control		gss1 RNAi				EV control		gss1 RNAi			Source	Type III Sum of Squares	df	Mean Square	F	Sig.	Partial Eta Squared
#	solvent	4MSOB-ITC	solvent	4MSOB-ITC		#	solvent	4MSOB-ITC	solvent	4MSOB-ITC		#	solvent	4MSOB-ITC	solvent	4MSOB-ITC		Corrected Model	8.092a	3	2.69719	1.14268	0.33493	0.0287037
1	1.2	0.9	1	1.1		1	7.8	2.9	4.6	2.1		1	7.6	3.4	8.7	6.5		Intercept	663.17	1	663.17	280.955	8.99313e-33	0.707775
2	5.4	1.7	1.2	0.9		2	6.2	3.4	2.1	1.5		2	4.2	3.4	4.9	3		RNAi	0.91875	1	0.91875	0.389232	0.533928	0.00334423
3	4.6	1	0.9	0.8		3	3.4	2.2	2.3	3.4		3	9.5	5	4.7	4		Inflitration	7.15408	1	7.15408	3.03086	0.0843463	0.0254628
4	2	2.3	2.6	0.6		4	2.9	2.9	4	0.7		4	9.6	6.9	4.6	4.9		RNAi * Inflitration	0.01875	1	0.01875	0.00794351	0.929135	6.84739e-05
5	1.4	3.1	4.9	1.6		5	4.6	2	1.2	5.7		5	9.5	6	8.8	7.7		Residuals	273.808	116	2.36042
6	1	0.7	4.5	3.9		6	7.7	6.9	7.6	2.2		6	5.9	7	8.6	6.5		Total	945.07	120
7	5.1	6	4.5	2.7		7	6.9	5.1	1.7	2.5		7	6	5.3	9.5	6.3		Corrected Total	281.9	119
8	4.6	1.9	3.8	1.6		8	6.8	3.4	1.6	3.7		8	7.3	2.3	8.6	2.7
9	4.4	3.2	2.6	0.7		9	5.2	2.5	4.1	5.6		9	9.8	2.6	7.6	6.4		6 dph
10	1.5	3.5	2.6	0.9		10	5	1.6	7.9	4.2		10	4.1	5.2	3.9	2.6		Source	Type III Sum of Squares	df	Mean Square	F	Sig.	Partial Eta Squared
11	2.5	2.6	0.8	1.2		11	4.5	2.7	6.5	3.9		11	8	2.1	3.5	2		Corrected Model	134.063a	3	44.6877	16.1429	7.79701e-09	0.294528
12	0.8	3.9	0.8	2.2		12	2.9	2.7	4.8	4.1		12	7.9	3.3	4.9	2.4		Intercept	1671.04	1	1671.04	603.646	8.54904e-48	0.83881
13	0.6	4.1	0.7	2.2		13	7.6	3.5	5.7	2.2		13	8.5	5.8	7.8	6.8		RNAi	5.89633	1	5.89633	2.12999	0.147145	0.0180309
14	0.7	4.6	0.6	2.5		14	3.2	4.2	6.1	0.8		14	8.7	2	8.2	3.1		Inflitration	128.133	1	128.133	46.2868	4.72648e-10	0.285216
15	0.5	0.8	0.5	3		15	4.6	3	4.7	5.8		15	5.3	2.4	8.3	2.6		RNAi * Inflitration	0.0333333	1	0.0333333	0.0120413	0.912811	0.000103794
16	1.8	0.6	2.3	0.9		16	2.9	2.2	6.9	0.9		16	9.5	7.8	9.8	6.5		Residuals	321.117	116	2.76825
17	0.6	0.6	2.4	3.5		17	5.8	1.6	7.8	1.1		17	9.6	3.1	6.5	2.4		Total	2126.22	120
18	4.2	0.5	4	0.8		18	6.4	1.5	8	0.9		18	9.4	2.4	9.4	5		Corrected Total	455.18	119
19	3.3	0.5	1.9	3.8		19	6.6	1.5	1.5	1.8		19	9.8	2.3	8.8	4.1
20	3.3	0.7	5.1	4.1		20	4.2	1.3	5.2	2		20	9.7	5.6	6.3	3.3		8 dph
21	0.7	4.5	4.8	0.8		21	4.5	1.4	4.2	1.2		21	9.3	4	4.8	3.2		Source	Type III Sum of Squares	df	Mean Square	F	Sig.	Partial Eta Squared
22	0.9	1.5	3.7	1.1		22	6.8	2.1	4.5	0.9		22	9.8	3.1	7.9	3.3		Corrected Model	362.035a	3	120.678	35.3394	2.68196e-16	0.47752
23	2.8	3.1	0.9	1.3		23	3.7	3.2	4.5	0.7		23	5	7.8	7.6	4.9		Intercept	4383.83	1	4383.83	1283.76	1.42779e-64	0.917129
24	2.9	1	1.2	3.1		24	4.3	2	4.6	5.6		24	7.1	2.8	7.5	3.1		RNAi	4.76008	1	4.76008	1.39394	0.240156	0.0118741
25	3.6	2.1	1.3	0.9		25	5.9	1.9	5.2	0.6		25	9.3	2.7	7.5	3.3		Inflitration	354.664	1	354.664	103.86	8.35054e-18	0.472391
26	3.4	1.7	3.5	4.4		26	2.9	6	3.9	0.7		26	6.8	3.4	7.7	5.8		RNAi * Inflitration	2.61075	1	2.61075	0.764532	0.383721	0.00654764
27	4.8	2	2.9	0.8		27	3.4	3.8	2.9	1		27	9.7	1.9	9.6	5.3		Residuals	396.121	116	3.41484
28	5.6	2.3	4.5	0.7		28	4	4	3.8	1.6		28	7.9	5.9	9.7	2.2		Total	5141.99	120
29	5	4.1	4.3	3.9		29	3.8	3.7	4.9	1.9		29	8.9	7.9	8.9	3.6		Corrected Total	758.156	119
30	0.9	0.7	0.8	4.2		30	4.6	2.9	4	4.5		30	9.6	7.9	7.9	4.7
Average	2.67	2.20667	2.52	2.00667		Average	4.97	2.93667	4.56	2.46		Average	8.11	4.37667	7.41667	4.27333
StDEV	1.73128	1.50171	1.5727	1.30989		StDEV	1.57177	1.34305	1.94893	1.73217		StDEV	1.79777	2.04428	1.86808	1.6609
StdEr	0.316088	0.274173	0.287134	0.239152		StdEr	0.286964	0.245206	0.355825	0.31625		StdEr	0.328226	0.373233	0.341063	0.303237
Figure 4B
Plutella pupal mortality							A two-sided proportions test
	myb28myb29							X-squared	df	P-value
	EV control		gss1 RNAi				#1	17.568	3	0.00054
#1	solvent	4MSOB-ITC	solvent	4MSOB-ITC			#2	16.61	3	0.0008502
# pupae observed	49	42	45	51			#3	13.322	3	0.003989
# pupae died	5	16	5	18
% pupae died	10.2041	38.0952	11.1111	35.2941
Plutella pupal mortality
	myb28myb29
	EV control		gss1 RNAi
#2	solvent	4MSOB-ITC	solvent	4MSOB-ITC
# pupae observed	44	39	41	45
# pupae died	3	12	4	16
% pupae died	6.81818	30.7692	9.7561	35.5556
Plutella pupal mortality
	myb28myb29
	EV control		gss1 RNAi
#3	solvent	4MSOB-ITC	solvent	4MSOB-ITC
# pupae observed	40	40	40	40
# pupae died	2	10	3	12
% pupae died	5	25	7.5	30
	Figure 4C,E												Figure 4D,F														Tukey HSD tests in conjuction with a one-way ANOVA
	Female												Male														Female	Number of egg laid
	EV control				gss1 RNAi				EV control		gss1 RNAi		EV control				gss1 RNAi				EV control		gss1 RNAi					Sum of Squares	df	Mean Square	F	Sig.
#	solvent		4MSOB-ITC		solvent		4MSOB-ITC		solvent	4MSOB-ITC	solvent	4MSOB-ITC	solvent		4MSOB-ITC		solvent		4MSOB-ITC		solvent	4MSOB-ITC	solvent	4MSOB-ITC			Between Groups	7334.83	3	2444.94	10.0456	1.1875e-05
	egg laid	egg hatched	egg laid	egg hatched	egg laid	egg hatched	egg laid	egg hatched	Egg hatching (%)				egg laid	egg hatched	egg laid	egg hatched	egg laid	egg hatched	egg laid	egg hatched	Egg hatching (%)						Residuals	18497.2	76	243.384
1	59	51	7	6	38	35	12	12	86.4407	85.7143	92.1053	100	40	33	56	21	44	29	35	33	82.5	37.5	65.9091	94.2857			Total	25832	79
2	38	33	9	7	42	37	10	9	86.8421	77.7778	88.0952	90	22	21	28	22	26	25	24	4	95.4545	78.5714	96.1538	16.6667
3	26	4	41	20	13	4	8	5	15.3846	48.7805	30.7692	62.5	36	9	44	5	19	16	43	4	25	11.3636	84.2105	9.30233			Male	Number of egg laid
4	38	35	31	11	9	9	36	12	92.1053	35.4839	100	33.3333	33	31	53	28	60	53	41	9	93.9394	52.8302	88.3333	21.9512				Sum of Squares	df	Mean Square	F	Sig.
5	49	42	46	31	60	37	8	7	85.7143	67.3913	61.6667	87.5	52	32	54	6	52	8	50	37	61.5385	11.1111	15.3846	74			Between Groups	85.6979	3	28.566	0.100244	0.959629
6	55	51	9	9	28	12	27	20	92.7273	100	42.8571	74.0741	48	47	10	7	43	33	10	0	97.9167	70	76.7442	0			Residuals	21372.3	75	284.964
7	60	13	12	11	37	35	19	18	21.6667	91.6667	94.5946	94.7368	47	22	8	1	28	21	8	4	46.8085	12.5	75	50			Total	21458	78
8	21	16	33	17	49	44	8	5	76.1905	51.5152	89.7959	62.5	60	56	56	23	36	32	58	42	93.3333	41.0714	88.8889	72.4138
9	56	53	34	32	55	47	38	28	94.6429	94.1176	85.4545	73.6842	20	20	37	11	15	12	8	2	100	29.7297	80	25
10	61	28	10	9	58	25	19	15	45.9016	90	43.1034	78.9474	11	11	48	9	57	52	9	2	100	18.75	91.2281	22.2222			Non-parametric Kruskal-Wallis tests with Dunn's post hoc tests
11	10	10	21	18	32	31	30	21	100	85.7143	96.875	70	9	8	59	26	42	42	12	3	88.8889	44.0678	100	25			Female	Egg hatching (%)
12	37	33	9	9	19	17	11	4	89.1892	100	89.4737	36.3636	58	12	48	10	49	40	55	42	20.6897	20.8333	81.6327	76.3636			X-squared	df	P-value
13	8	5	41	29	12	11	8	6	62.5	70.7317	91.6667	75	57	47	45	36	36	15	54	13	82.4561	80	41.6667	24.0741			0.5036	3	0.9181
14	47	45	46	44	26	23	42	40	95.7447	95.6522	88.4615	95.2381	44	37	58	37	55	49	58	30	84.0909	63.7931	89.0909	51.7241
15	50	42	37	36	34	31	10	8	84	97.2973	91.1765	80	36	33	37	4	22	21	57	50	91.6667	10.8108	95.4545	87.7193			Male	Egg hatching (%)
16	49	47	23	22	55	53	21	21	95.9184	95.6522	96.3636	100	37	36	21	11	49	42	39	5	97.2973	52.381	85.7143	12.8205			X-squared	df	P-value
17	62	57	41	38	49	40	39	27	91.9355	92.6829	81.6327	69.2308	19	18	16	3	55	43	48	4	94.7368	18.75	78.1818	8.33333			30.397	3	1.139e-06
18			8	2	9	6	8	7		25	66.6667	87.5	56	52	57	50	52	49	23	15	92.8571	87.7193	94.2308	65.2174
19			10	8	17	12	8	8		80	70.5882	100	59	12	27	8			57	10	20.339	29.6296		17.5439
20			9	8	59	21	10	8		88.8889	35.5932	80			54	10			49	39		18.5185		79.5918
21					57	49	12	7			85.9649	58.3333							56	6				10.7143
22							16	15				93.75							57	13				22.807
