# Supplementary material for: Tritrophic metabolism of plant chemical defenses and its effects on herbivore and predator performance
Source: eLife. 2019 Dec 16;8:e51029. doi: 10.7554/eLife.51029 (PMC6934381; doi:10.7554/eLife.51029)
Supplement: Figure 5—figure supplement 1—source data 1. [file elife-51029-fig5-figsupp1-data1.xlsx]

## Sheet: Figure 5 - figure supplement 1
Figure 5 - figure supplement 1
	A. thaliana		P. xylostella								C. carnea
	Leaf		Midgut		Hemolymph		Integument + fat body		Frass		Gut		Hemolymph		Malpighian tubules		Anal secretion	Integument + fat body	Integument + fat body
4MSOB-ITC	EV control	gss1 RNAi	EV control	gss1 RNAi	EV control	gss1 RNAi	EV control	gss1 RNAi	EV control	gss1 RNAi	EV control	gss1 RNAi	EV control	gss1 RNAi	EV control	gss1 RNAi	EV control	gss1 RNAi	EV control	gss1 RNAi
#1	2.67288	4.07112	24.9335	458.254	14.5497	318.353	10.1973	9.97963	167.666	488.638	4.29719	25.5409	1.35551	32.3869	2.06835	79.4572	8.76816	354.337	0.76886	6.00343
#2	2.77839	4.21089	23.4412	473.177	32.0011	356.904	19.8971	19.5551	129.525	438.026	0.947909	104.27	0.797824	67.7755	1.13812	109.525	6.84601	292.272	0.372844	20.6012
#3	6.14878	15.0536	50.9241	499.914	33.0374	258.662	18.0006	9.82418	242.945	424.426	1.42976	33.6508	2.038	42.4979	1.90274	79.0293	12.9706	318.603	0.226313	8.39953
#4	5.49164	14.5397	47.5043	440.845	43.1103	361.464	11.5341	8.39408	185.64	532.383	1.20858	27.3314	0.986879	52.214	2.31148	79.7214	9.09993	308.07	0.241322	5.97183
#5	11.1834	10.6687	50.1158	368.096	20.0214	339.908	10.3216	11.1921	114.984	411.563	0.83732	42.4453	0.600343	16.957	1.72656	76.8145	6.31939	366.525	0.339667	10.4902
Average	5.65501	9.70879	39.3838	448.057	28.544	327.058	13.9901	11.789	168.152	459.007	1.74415	46.6477	1.15571	42.3663	1.82945	84.9095	8.80081	327.962	0.389801	10.2932
StDEV	3.46415	5.35808	13.9398	49.6739	11.3225	41.8134	4.60576	4.45332	50.5444	50.3713	1.44568	32.8844	0.566433	19.2863	0.442527	13.8084	2.61992	31.3839	0.220942	6.06128
StdEr	1.54922	2.39621	6.23406	22.2148	5.06357	18.6995	2.05976	1.99159	22.6041	22.5267	0.64653	14.7063	0.253316	8.62508	0.197904	6.17529	1.17167	14.0353	0.0988081	2.71069
4MSOB-ITC-GSH
#1	0.0137339	0.0165576	1.63529	15.4824	0.654945	2.86435	0.612457	0.854952	0.00587023	0.0112813	0.0248036	0.226972	0.00347567	0.153403	0.00470188	0.35809	0.00462106	0.0451385	0.0199061	0.215807
#2	0.0111247	0.0157598	2.02701	28.4777	3.19597	4.09548	1.65705	2.31614	0.00603034	0.0127491	0.0131127	1.24808	0.0010743	0.30965	0.000683485	0.291921	0.00144293	1.09799	0.00669856	0.688814
#3	0.0328255	0.0328045	0.092024	9.38893	3.09234	2.89751	1.91198	0.795883	0.0129461	0.0235163	0.00884715	0.134287	0.00597183	0.0507131	0.00145104	0.235761	0.00660377	0.0398912	0.00971607	0.287006
#4	0.0246822	0.0331805	0.00253688	36.25	2.27987	3.19597	1.07569	0.429031	0.0091291	0.0144648	0.0218809	0.0921578	0.00122175	0.0955808	0.0021174	0.502104	0.00673016	0.13018	0.00679335	0.194321
#5	0.0515358	0.0745011	0.00808319	56.0227	0.638364	3.23742	0.867388	0.926458	0.00591242	0.0180952	0.0100584	0.146926	0.000916312	0.292799	0.00180602	1.18792	0.00122175	0.052214	0.00745162	0.530829
Average	0.0267804	0.0345607	0.75299	29.1243	1.9723	3.25815	1.22491	1.06449	0.00797765	0.0160213	0.0157406	0.369685	0.00253197	0.180429	0.00215197	0.51516	0.00412393	0.273084	0.0101131	0.383356
StDEV	0.0163485	0.0238632	0.994552	18.3732	1.26108	0.497634	0.544061	0.725526	0.00310283	0.00490088	0.00718601	0.493457	0.00218946	0.116276	0.00152239	0.389022	0.00268326	0.462607	0.00560856	0.216877
StdEr	0.00731126	0.0106719	0.444777	8.21676	0.56397	0.222549	0.243311	0.324465	0.00138763	0.00219174	0.00321368	0.220681	0.000979158	0.0520004	0.000680832	0.173976	0.00119999	0.206884	0.00250822	0.0969904
4MSOB-ITC-CG
#1	0	0.00507747	0.272341	0.561471	0.501572	0.596912	0.0366852	0.0422813	0.0143111	0.00905128	0.0145188	0.00305964	0.0114697	0.0581384	0.00904566	0.660131	0.115724	1.51665	0.00484487	0.0012228
#2	0.00480967	0.00492848	0.27545	0.410999	3.42395	0.978273	0.0246848	0.175654	0.00666735	0.0157048	0.0168517	0.00408654	0.00267784	1.0269	0.00150865	0.00380146	0.0412867	1.11221	0.000919472	0.00244877
#3	0.00532709	0.00957076	0.0652873	0.542817	0.903659	0.787593	0.0525407	0.037307	0.011799	0.0204039	0.0135077	0.00407601	0.0152929	0.853118	0.00604082	0.00969734	0.105376	0.882082	0.00153245	0.00552947
#4	0.0100815	0.0106884	0.0412864	0.789665	0.431103	0.812464	0.0281357	0.0435248	0.0158558	0.0059935	0.0225918	0.00679335	0.0086681	1.11379	0.00451505	0.0885494	0.093527	2.0854	0.00133892	0.00152929
#5	0.00492848	0.010307	0.0307161	0.907804	0.804173	1.04874	0.0466338	0.0255864	0.00342413	0.0148979	0.00331242	0.00280686	0.0021012	0.529776	0.00150709	0.460846	0.0874183	2.56725	0.000510818	0.00445517
Average	0.00502935	0.00811442	0.137016	0.642551	1.21289	0.844797	0.037736	0.0648707	0.0104115	0.0132103	0.0141565	0.00416448	0.00804196	0.716346	0.00452345	0.244605	0.0886664	1.63272	0.00182931	0.0030371
StDEV	0.00356951	0.0028691	0.125584	0.201332	1.25186	0.1769	0.0118528	0.0623335	0.00523485	0.00570521	0.00701009	0.00158024	0.00567416	0.430454	0.00319923	0.298724	0.0286415	0.693925	0.00173122	0.00187977
StdEr	0.00159633	0.0012831	0.056163	0.0900386	0.55985	0.0791119	0.00530072	0.0278764	0.00234109	0.00255145	0.00313501	0.000706705	0.00253756	0.192505	0.00143074	0.133593	0.0128089	0.310333	0.000774223	0.000840659
4MSOB-ITC-Cys
#1	0.0670198	0.097318	0.907804	4.46441	2.6032	4.31103	0.0820754	0.1256	0.00709799	0.0278425	0.021012	3.18076	0.00971607	0.62246	0.0558932	3.1761	0.402861	4.17531	0.0542415	1.87686
#2	0.165856	0.208127	1.68503	3.76801	19.3167	12.3942	0.525407	0.674635	0.0168595	0.0251776	0.0132181	9.47909	0.0149296	5.37149	0.00294257	3.77551	0.119015	7.15671	0.019053	4.1392
#3	0.0510485	0.0826911	0.203323	3.09648	22.9645	5.92767	0.335763	0.0979309	0.0245813	0.0267545	0.0383113	4.38145	0.0169044	2.51196	0.0117703	2.31313	0.263835	8.38636	0.0251986	1.72993
#4	0.0772894	0.133456	0.0279181	6.71526	14.3425	5.09863	0.166327	0.0466338	0.00433742	0.0197886	0.042024	4.19187	0.0286479	6.81705	0.0513781	7.08395	0.224654	8.21521	0.0295037	2.3129
#5	0.284173	0.315654	0.0555875	4.15973	11.1092	4.18668	0.376179	0.0500536	0.00547715	0.0156122	0.0187475	6.16141	0.0194716	3.01224	0.0103068	4.74858	0.236977	10.348	0.0195375	2.76789
Average	0.129077	0.167449	0.575933	4.44078	14.0672	6.38364	0.29715	0.198971	0.0116707	0.0230351	0.0266626	5.47892	0.0179339	3.66704	0.0264582	4.21946	0.249469	7.65632	0.0295068	2.56536
StDEV	0.097505	0.096017	0.715919	1.37045	7.85763	3.43178	0.175506	0.26797	0.00875576	0.00517627	0.0127181	2.48041	0.00697807	2.44234	0.0250849	1.83065	0.101889	2.2615	0.014483	0.968725
StdEr	0.0436055	0.0429401	0.320169	0.612886	3.51404	1.53474	0.0784887	0.11984	0.0039157	0.0023149	0.0056877	1.10927	0.00312069	1.09225	0.0112183	0.818691	0.0455662	1.01137	0.00647702	0.433227
4MSOB-ITC-Nac
#1	0.00816782	0.00979637	0.0261149	0.0621784	0.0489136	0.0410377	0.0184359	0.0216381	0.0229438	0.026006	0.333348	1.4166	0.319129	2.41717	1.03715	56.2425	4.85803	47.3955	0.124808	1.16593
#2	0.0110841	0.00756992	0.0499914	0.040105	0.286849	0.163322	0.0224775	0.0441466	0.0217432	0.0227204	0.0742529	4.37618	0.140607	81.5202	0.198279	71.8124	4.93966	169.044	0.0606662	5.37149
#3	0.00436763	0.00734254	0.00783447	0.0425922	0.284777	0.0717124	0.0145808	0.00693289	0.0430172	0.0455865	0.164304	2.85953	0.584544	42.8139	0.785488	30.0686	11.7225	226.445	0.0703033	1.7589
#4	0.00773437	0.0054723	0.00391102	0.0752358	0.196484	0.0654945	0.0240319	0.00867388	0.0277367	0.0165742	0.226708	2.13806	0.857331	68.5654	1.0219	98.6626	3.25449	211.7	0.107035	2.64151
#5	0.0313208	0.0179712	0.0033825	0.0568932	0.120211	0.0754431	0.0447684	0.0113476	0.0150531	0.0210203	0.0968974	2.95958	0.15285	24.8563	0.403421	77.4049	4.42358	224.339	0.0531882	3.88643
Average	0.0125349	0.00963047	0.0182469	0.0554009	0.187447	0.0834019	0.0248589	0.0185478	0.0260988	0.0263815	0.179102	2.74999	0.410892	44.0346	0.689247	66.8382	5.83965	175.785	0.0832001	2.96485
StDEV	0.0107684	0.00490833	0.0200281	0.014488	0.10386	0.0466438	0.0117222	0.0154037	0.0104863	0.0112617	0.104914	1.10146	0.307215	32.0478	0.3754	25.561	3.35669	75.404	0.0311213	1.69087
StdEr	0.00481578	0.00219507	0.00895686	0.00647924	0.0464477	0.0208597	0.00524232	0.00688874	0.00468961	0.00503637	0.0469191	0.492586	0.137391	14.3322	0.167884	11.4312	1.50116	33.7217	0.0139178	0.756181
