# Supplementary material for: Tritrophic metabolism of plant chemical defenses and its effects on herbivore and predator performance
Source: eLife. 2019 Dec 16;8:e51029. doi: 10.7554/eLife.51029 (PMC6934381; doi:10.7554/eLife.51029)
Supplement: Figure 5—source data 1. [file elife-51029-fig5-data1.xlsx]

## Sheet: Figure 5
Figure 5B
Desulfo-4MSOB
	Gut				Hemolymph				Malpighian tubules				Anal secretion				Integument+fat body				Pupal pellet				Meconium				Female				Male
	Col-0	Col-0	myb28myb29	myb28myb29	Col-0	Col-0	myb28myb29	myb28myb29	Col-0	Col-0	myb28myb29	myb28myb29	Col-0	Col-0	myb28myb29	myb28myb29	Col-0	Col-0	myb28myb29	myb28myb29	Col-0	Col-0	myb28myb29	myb28myb29	Col-0	Col-0	myb28myb29	myb28myb29	Col-0	Col-0	myb28myb29	myb28myb29	Col-0	Col-0	myb28myb29	myb28myb29
#	EV control	gss1 RNAi	EV control	gss1 RNAi	EV control	gss1 RNAi	EV control	gss1 RNAi	EV control	gss1 RNAi	EV control	gss1 RNAi	EV control	gss1 RNAi	EV control	gss1 RNAi	EV control	gss1 RNAi	EV control	gss1 RNAi	EV control	gss1 RNAi	EV control	gss1 RNAi	EV control	gss1 RNAi	EV control	gss1 RNAi	EV control	gss1 RNAi	EV control	gss1 RNAi	EV control	gss1 RNAi	EV control	gss1 RNAi
1	85.3998	20.6225	0.110071	0.0628374	28.087	7.76822	1.46761	0.877193	105.169	48.4113	1.29375	0.0646041	118.927	67.2354	0.482351	0.370066	14.8026	3.06174	0.159919	0.0921053	493.996	95.7018	1.65195	0.837093	0.148675	0.00974225	0.16996	0.129058	0.101499	0.0922867	0.0122943	0.0246204	0.0953047	0.0246204	0.0246204	10.7059
2	145.074	35.8047	0.11724	0.291835	43.5223	16.0678	0.508603	1.91043	67.1916	30.2223	0.032302	0.032469	108.806	63.8917	0.408021	0.255145	49.5951	5.92105	0.133856	0.457996	274.795	47.3346	10.8012	1.93786	0.0153811	0.00616833	0.00460639	0.0054006	0.290679	0.0276384	0.0416164	0.0276384	0.117066	0.0463816	0.0308152	0.023032
3	96.7864	15.0135	0.0704285	0.0306174	38.9676	13.5374	1.04884	0.44914	77.4581	11.3874	0.032302	0.0484948	130.314	99.4222	0.607287	0.362302	20.3378	7.33806	0.0587045	0.083249	344.156	45.8654	6.51248	0.13839	0.752907	0.0113042	0.00460639	0.00614186	0.0676663	0.0123102	0.0123261	0.212847	0.146293	0.0552767	0.0214435	0.0276384
4	97.419	21.5503	0.0199899	0.0236589	33.5695	10.501	1.31073	0.433957	58.5944	16.5371	0.032302	0.0651884	111.589	36.0577	1.60784	0.505282	18.7247	5.59211	0.212298	0.0218117	134.062	81.8032	1.77902	2.44218	0.0150581	0.0153758	0.706843	0.0040981	2.60499	0.00924455	0.384395	0.143116	0.206493	0.0184256	0.0538471	0.0214435
5	162.787	21.8877	0.0801282	0.0472335	107.857	13.8327	0.416245	0.814777	86.8065	18.822	0.0323855	0.0323855	137.905	47.9504	0.329475	0.339069	99.7385	2.88462	0.0885628	0.0240385	355.804	100.705	1.49469	1.37662	0.0848665	0.0333566	0.0054006	0.00184573	0.0246204	0.0216024	0.0246204	0.135333	0.144545	0.0276384	0.624246	0.0754495
Average	117.493	22.9757	0.0795715	0.0912365	50.4006	12.3414	0.950405	0.897099	79.044	25.076	0.284609	0.0486283	121.508	62.9115	0.686994	0.366373	40.6398	4.95951	0.130668	0.13584	320.563	74.282	4.44787	1.34643	0.203378	0.0151894	0.178283	0.0293089	0.617892	0.0326164	0.0950505	0.108711	0.14194	0.0344685	0.150994	2.17069
StDEV	34.1831	7.69305	0.038675	0.113164	32.6359	3.23425	0.471047	0.601907	18.0553	14.7515	0.564128	0.016236	12.3773	23.9669	0.52484	0.0900599	35.822	1.92931	0.0601681	0.183006	131.106	26.207	4.13184	0.904179	0.31218	0.0106798	0.303998	0.0557855	1.11546	0.0341512	0.162194	0.0812107	0.0417925	0.0156198	0.264859	4.77137
StdEr	15.2872	3.44044	0.017296	0.0506083	14.5952	1.4464	0.210658	0.269181	8.07458	6.59707	0.252286	0.00726096	5.53531	10.7183	0.234716	0.040276	16.0201	0.862813	0.026908	0.0818428	58.6323	11.7201	1.84782	0.404361	0.139611	0.00477613	0.135952	0.024948	0.49885	0.0152729	0.0725355	0.0363185	0.0186902	0.0069854	0.118449	2.13382
Figure 5C
4MSOB-ITC
	Gut				Hemolymph				Malpighian tubules				Anal secretion				Integument+fat body				Pupal pellet				Meconium				Female				Male
	Col-0	Col-0	myb28myb29	myb28myb29	Col-0	Col-0	myb28myb29	myb28myb29	Col-0	Col-0	myb28myb29	myb28myb29	Col-0	Col-0	myb28myb29	myb28myb29	Col-0	Col-0	myb28myb29	myb28myb29	Col-0	Col-0	myb28myb29	myb28myb29	Col-0	Col-0	myb28myb29	myb28myb29	Col-0	Col-0	myb28myb29	myb28myb29	Col-0	Col-0	myb28myb29	myb28myb29
#	EV control	gss1 RNAi	EV control	gss1 RNAi	EV control	gss1 RNAi	EV control	gss1 RNAi	EV control	gss1 RNAi	EV control	gss1 RNAi	EV control	gss1 RNAi	EV control	gss1 RNAi	EV control	gss1 RNAi	EV control	gss1 RNAi	EV control	gss1 RNAi	EV control	gss1 RNAi	EV control	gss1 RNAi	EV control	gss1 RNAi	EV control	gss1 RNAi	EV control	gss1 RNAi	EV control	gss1 RNAi	EV control	gss1 RNAi
1	4.29719	25.5409	0.0832054	0.065827	1.35551	32.3869	0.73147	0.669856	2.06835	79.4572	1.19802	2.21987	8.76816	354.337	0.324856	0.340457	0.76886	6.00343	0.0698293	0.0796244	5.35578	61.6278	1.13499	1.23775	0.305155	1.54913	0.159973	0.130781	1.22373	1.18792	0.932591	1.18637	1.46973	1.88386	1.65033	1.7126
2	0.947909	104.27	0.058981	0.065827	0.797824	67.7755	1.01742	0.677755	1.13812	109.525	1.19098	2.35376	6.84601	292.272	0.52135	0.312678	0.372844	20.6012	0.0619301	0.072989	3.22281	57.6058	1.20816	1.21284	0.201101	1.37008	0.112876	0.12611	1.0805	1.24397	1.21128	1.25331	1.50709	1.85273	1.58805	1.41523
3	1.42976	33.6508	0.0637206	0.0821521	2.038	42.4979	0.993725	1.47716	1.90274	79.0293	1.12755	2.29739	12.9706	318.603	0.470005	0.347926	0.226313	8.39953	0.0698293	0.0650898	1.73855	37.9498	1.23775	1.69704	0.235717	1.78007	0.12611	0.128186	0.874985	1.07894	1.06804	1.30002	1.49931	1.65033	1.7126	1.55691
4	1.20858	27.3314	0.0668803	0.0805723	0.986879	52.214	0.401282	1.21964	2.31148	79.7214	1.49401	2.42424	9.09993	308.07	0.136591	0.453219	0.241322	5.97183	0.0679335	0.0641419	2.80244	39.3121	1.14277	1.46544	0.198039	1.6223	0.123385	0.13597	1.16768	1.11786	1.1817	1.54446	1.44326	1.58805	1.53979	1.61919
5	0.83732	42.4453	0.0514504	0.0674069	0.600343	16.957	1.08852	1.0111	1.72656	76.8145	2.21987	2.54404	6.31939	366.525	0.277461	0.339667	0.339667	10.4902	0.0789924	0.0641419	4.56694	58.2285	1.14277	0.813487	0.17771	1.57693	0.0669473	0.102756	1.2393	1.16768	1.21906	1.49152	1.53045	1.24397	1.68147	1.47128
Average	1.74415	46.6477	0.0648475	0.0723571	1.15571	42.3663	0.846483	1.0111	1.82945	84.9095	1.44609	2.36786	8.80081	327.962	0.346053	0.35879	0.389801	10.2932	0.0697029	0.0691974	3.53731	50.9448	1.17329	1.28531	0.223545	1.5797	0.117858	0.124761	1.11724	1.15928	1.12253	1.35514	1.48997	1.64379	1.63445	1.55504
StDEV	1.44568	32.8844	0.0117931	0.00826469	0.566433	19.2863	0.283246	0.349381	0.442527	13.8084	0.455279	0.123778	2.61992	31.3839	0.154209	0.0544585	0.220942	6.06128	0.00612117	0.00691173	1.4354	11.355	0.0466373	0.328671	0.0501582	0.147347	0.0335001	0.0128418	0.149015	0.0637061	0.12221	0.155187	0.03395	0.257047	0.070151	0.117799
StdEr	0.64653	14.7063	0.00527405	0.00369608	0.253316	8.62508	0.126671	0.156248	0.197904	6.17529	0.203607	0.0553553	1.17167	14.0353	0.0689643	0.0243546	0.0988081	2.71069	0.00273747	0.00309102	0.641929	5.07809	0.0208568	0.146986	0.0224314	0.0658957	0.0149817	0.00574302	0.0666417	0.0284902	0.0546541	0.0694017	0.0151829	0.114955	0.0313725	0.0526812
Figure 5D
4MSOB-ITC-NAC
	Gut				Hemolymph				Malpighian tubules				Anal secretion				Integument+fat body				Pupal pellet				Meconium				Female				Male
	Col-0	Col-0	myb28myb29	myb28myb29	Col-0	Col-0	myb28myb29	myb28myb29	Col-0	Col-0	myb28myb29	myb28myb29	Col-0	Col-0	myb28myb29	myb28myb29	Col-0	Col-0	myb28myb29	myb28myb29	Col-0	Col-0	myb28myb29	myb28myb29	Col-0	Col-0	myb28myb29	myb28myb29	Col-0	Col-0	myb28myb29	myb28myb29	Col-0	Col-0	myb28myb29	myb28myb29
#	EV control	gss1 RNAi	EV control	gss1 RNAi	EV control	gss1 RNAi	EV control	gss1 RNAi	EV control	gss1 RNAi	EV control	gss1 RNAi	EV control	gss1 RNAi	EV control	gss1 RNAi	EV control	gss1 RNAi	EV control	gss1 RNAi	EV control	gss1 RNAi	EV control	gss1 RNAi	EV control	gss1 RNAi	EV control	gss1 RNAi	EV control	gss1 RNAi	EV control	gss1 RNAi	EV control	gss1 RNAi	EV control	gss1 RNAi
1	0.333348	1.4166	0.0642472	0.0942643	0.319129	2.41717	0.477114	0.182209	1.03715	56.2425	0.612376	0.364527	4.85803	47.3955	1.20957	0.410761	0.124808	1.16593	0.0158301	0.022971	0.16659	5.37135	0.189943	0.0454619	3.00484	4.67074	1.51021	2.22249	0.817379	12.9379	0.990197	0.182159	0.23198	6.63245	0.552704	0.501326
2	0.0742529	4.37618	0.0737263	0.0911046	0.140607	81.5202	0.633519	0.103006	0.198279	71.8124	0.567382	0.314195	4.93966	169.044	2.33028	1.38895	0.0606662	5.37149	0.0114065	0.0288164	0.119415	6.16538	0.0586956	0.0400127	1.33376	3.60685	1.85273	1.48296	0.871871	3.1761	1.05714	0.381444	0.619651	11.4744	0.256891	0.540249
3	0.164304	2.85953	0.0895248	0.119015	0.584544	42.8139	0.323869	0.263835	0.785488	30.0686	0.229546	0.235646	11.7225	226.445	0.995305	0.412915	0.0703033	1.7589	0.0223391	0.0363365	0.0586437	3.09436	0.0747318	0.0334736	2.08004	6.12386	1.50242	1.85792	2.10183	5.10667	0.415696	0.608753	0.275574	3.5809	0.951274	0.787798
4	0.226708	2.13806	0.0863651	0.112696	0.857331	68.5654	0.846799	0.330188	1.0219	98.6626	0.349275	0.460616	3.25449	211.7	0.694475	1.66872	0.107035	2.64151	0.0254988	0.0149138	0.175931	0.585788	0.0814265	0.0823218	1.47907	4.6396	1.51799	2.04475	0.945046	23.198	0.286472	0.429708	0.467074	7.39534	1.33895	0.40324
5	0.0968974	2.95958	0.0388643	0.0542415	0.15285	24.8563	0.636679	1.05218	0.403421	77.4049	0.340124	0.32716	4.42358	224.339	0.766885	2.51986	0.0531882	3.88643	0.0117541	0.0198745	0.09383	3.30066	0.0766001	0.0853707	1.31893	3.55866	2.4716	0.818936	0.130314	3.95456	0.303598	0.727078	0.63522	3.68988	0.63055	0.110541
Average	0.179102	2.74999	0.0705455	0.0942643	0.410892	44.0346	0.583596	0.386284	0.689247	66.8382	0.41974	0.340429	5.83965	175.785	1.1993	1.28024	0.0832001	2.96485	0.0173657	0.0245824	0.122882	3.70351	0.0962795	0.0573281	1.84333	4.51994	1.77099	1.68541	0.973289	9.67466	0.610621	0.465828	0.4459	6.5546	0.746073	0.468631
StDEV	0.104914	1.10146	0.0203958	0.0253187	0.307215	32.0478	0.19582	0.381919	0.3754	25.561	0.163083	0.0819594	3.35669	75.404	0.663826	0.895493	0.0311213	1.69087	0.00632932	0.00828145	0.0492625	2.18495	0.0530511	0.0246005	0.719807	1.04492	0.418832	0.556575	0.710565	8.5051	0.381049	0.210697	0.187918	3.23911	0.413413	0.24524
StdEr	0.0469191	0.492586	0.00912129	0.0113229	0.137391	14.3322	0.0875735	0.1708	0.167884	11.4312	0.072933	0.0366534	1.50116	33.7217	0.296872	0.400477	0.0139178	0.756181	0.00283056	0.00370358	0.0220309	0.977139	0.0237252	0.0110017	0.321908	0.467301	0.187307	0.248908	0.317774	3.8036	0.17041	0.0942266	0.0840396	1.44857	0.184884	0.109675
Tukey HSD tests in conjuction with a one-way ANOVA
	Desulfo-4MSOB							4MSOB-ITC							4MSOB-ITC-NAC
Gut		Sum of Squares	df	Mean Square	F	Sig.	Gut		Sum of Squares	df	Mean Square	F	Sig.	Gut		Sum of Squares	df	Mean Square	F	Sig.
	Between Groups	19094.2	3	6364.73	32.3777	4.99575e-07		Between Groups	8028.23	3	2676.08	9.89469	0.000626997		Between Groups	26.5641	3	8.85471	29.0977	1.02744e-06
	Residuals	3145.24	16	196.577				Residuals	4327.29	16	270.456				Residuals	4.86896	16	0.30431
	Total	22239.4	19					Total	12355.5	19					Total	31.4331	19
Hemolymph		Sum of Squares	df	Mean Square	F	Sig.	Hemolymph		Sum of Squares	df	Mean Square	F	Sig.	Hemolymph		Sum of Squares	df	Mean Square	F	Sig.
	Between Groups	8256.82	3	2752.27	10.2296	0.000529407		Between Groups	6416.01	3	2138.67	22.9675	4.84519e-06		Between Groups	7121.09	3	2373.7	9.24246	0.000880843
	Residuals	4304.8	16	269.05				Residuals	1489.88	16	93.1174				Residuals	4109.2	16	256.825
	Total	12561.6	19					Total	7905.88	19					Total	11230.3	19
Malpighian tubules		Sum of Squares	df	Mean Square	F	Sig.	Malpighian tubules		Sum of Squares	df	Mean Square	F	Sig.	Malpighian tubules		Sum of Squares	df	Mean Square	F	Sig.
	Between Groups	20747	3	6915.65	50.8554	2.10474e-08		Between Groups	25854.1	3	8618.05	180.333	1.52773e-12		Between Groups	16510.4	3	5503.46	33.6884	3.81018e-07
	Residuals	2175.79	16	135.987				Residuals	764.632	16	47.7895				Residuals	2613.82	16	163.364
	Total	22922.7	19					Total	26618.8	19					Total	19124.2	19
Anal secretion		Sum of Squares	df	Mean Square	F	Sig.	Anal secretion		Sum of Squares	df	Mean Square	F	Sig.	Anal secretion		Sum of Squares	df	Mean Square	F	Sig.
	Between Groups	48939.8	3	16313.3	199.006	7.10588e-13		Between Groups	133825	3	44608.2	110.697	6.51469e-11		Between Groups	34003.8	3	11334.6	32.6592	4.70977e-07
	Residuals	1311.58	16	81.9736				Residuals	6447.59	16	402.974				Residuals	5552.91	16	347.057
	Total	50251.4	19					Total	140272	19					Total	39556.7	19
Integument+fat body		Sum of Squares	df	Mean Square	F	Sig.	Integument+fat body		Sum of Squares	df	Mean Square	F	Sig.	Integument+fat body		Sum of Squares	df	Mean Square	F	Sig.
	Between Groups	5751.98	3	1917.33	5.95854	0.00629283		Between Groups	384.094	3	128.031	13.9192	0.000100502		Between Groups	32.0888	3	10.6963	14.9808	6.59766e-05
	Residuals	5148.44	16	321.778				Residuals	147.171	16	9.19816				Residuals	11.424	16	0.714
	Total	10900.4	19					Total	531.265	19					Total	43.5128	19
Pupal pellet		Sum of Squares	df	Mean Square	F	Sig.	Pupal pellet		Sum of Squares	df	Mean Square	F	Sig.	Pupal pellet		Sum of Squares	df	Mean Square	F	Sig.
	Between Groups	346649	3	115550	24.9073	2.86919e-06		Between Groups	4699.47	3	1566.49	14.5713	7.74043e-05		Between Groups	25.7001	3	8.5667	6.54374	0.00427523
	Residuals	74226.9	16	4639.18				Residuals	1720.08	16	107.505				Residuals	20.9463	16	1.30915
	Total	420876	19					Total	6419.55	19					Total	46.6464	19
Meconium		Sum of Squares	df	Mean Square	F	Sig.	Meconium		Sum of Squares	df	Mean Square	F	Sig.	Meconium		Sum of Squares	df	Mean Square	F	Sig.
	Between Groups	0.1433	3	0.0477667	0.990342	0.42235		Between Groups	7.63325	3	2.54442	397.1	3.158e-15		Between Groups	28.5183	3	9.50609	18.2319	2.05377e-05
	Residuals	0.77172	16	0.0482325				Residuals	0.10252	16	0.0064075				Residuals	8.3424	16	0.5214
	Total	0.91502	19					Total	7.73577	19					Total	36.8607	19
Female		Sum of Squares	df	Mean Square	F	Sig.	Female		Sum of Squares	df	Mean Square	F	Sig.	Female		Sum of Squares	df	Mean Square	F	Sig.
	Between Groups	1.10416	3	0.368053	1.15532	0.35733		Between Groups	0.1894	3	0.0631333	3.88035	0.029271		Between Groups	303.894	3	101.298	5.54748	0.00834872
	Residuals	5.09716	16	0.318573				Residuals	0.26032	16	0.01627				Residuals	292.163	16	18.2602
	Total	6.20132	19					Total	0.44972	19					Total	596.058	19
Male		Sum of Squares	df	Mean Square	F	Sig.	Male		Sum of Squares	df	Mean Square	F	Sig.	Male		Sum of Squares	df	Mean Square	F	Sig.
	Between Groups	15.9951	3	5.3317	0.933221	0.447496		Between Groups	0.077175	3	0.025725	1.20379	0.340224		Between Groups	135.277	3	45.0925	16.7772	3.39072e-05
	Residuals	91.4116	16	5.71323				Residuals	0.34192	16	0.02137				Residuals	43.0036	16	2.68772
	Total	107.407	19					Total	0.419095	19					Total	178.281	19
