# Supplementary material for: Tritrophic metabolism of plant chemical defenses and its effects on herbivore and predator performance
Source: eLife. 2019 Dec 16;8:e51029. doi: 10.7554/eLife.51029 (PMC6934381; doi:10.7554/eLife.51029)
Supplement: Figure 6—source data 1. [file elife-51029-fig6-data1.xlsx]

## Sheet: Figure 6
Figure 6A
5 dph						8 dph						11 dph						13 dph						Tukey HSD tests in conjuction with a one-way ANOVA
	Col-0	Col-0	myb28myb29	myb28myb29			Col-0	Col-0	myb28myb29	myb28myb29			Col-0	Col-0	myb28myb29	myb28myb29			Col-0	Col-0	myb28myb29	myb28myb29		5dph
#	EV control	gss1 RNAi	EV control	gss1 RNAi		#	EV control	gss1 RNAi	EV control	gss1 RNAi		#	EV control	gss1 RNAi	EV control	gss1 RNAi		#	EV control	gss1 RNAi	EV control	gss1 RNAi			Sum of Squares	df	Mean Square	F	Sig.
1	2.8	0.3	1.8	0.9		1	5.5	0.6	2.7	1		1	7.2	0.7	5.7	5		1	15.2	7.2	11.7	10.7		Between Groups	4.32292	3	1.44097	2.19458	0.0924217
2	0.3	1.2	2	1.6		2	0.6	2.6	4	2.7		2	2.2	5.1	8.2	6.7		2	2.4	3	11.5	6.3		Residuals	76.1663	116	0.656606
3	0.5	0.5	1.3	2.2		3	2.8	0.5	1.6	3.8		3	4.6	2.3	2.9	6.9		3	9.3	8.6	6.8	9.9		Total	80.4892	119
4	1.5	1	2.2	2.4		4	3.6	1.4	4.7	5.3		4	5.5	2.8	8.7	4.4		4	18.5	5.9	11.5	8
5	2.6	0.4	1.3	0.6		5	6.5	1.8	3.2	2.3		5	12	3.6	6.3	7.1		5	14.1	2.2	10.7	7.5		8 dph
6	0.5	2.5	1.6	0.6		6	2.5	3.4	6.6	0.9		6	6.9	6.9	8.3	3.5		6	4.2	5.2	12.8	10.4			Sum of Squares	df	Mean Square	F	Sig.
7	2.7	2.7	2.9	2		7	2.1	3.1	1.5	3.4		7	3.4	5.9	2.4	8.8		7	5.4	8.1	6	5.3		Between Groups	31.9063	3	10.6354	5.16364	0.00244086
8	1.6	0.8	0.7	1.3		8	2.3	2.1	3.2	2.1		8	3.3	3.6	2.4	3.4		8	12.1	6.4	7.9	5.5		Residuals	185.371	90	2.05968
9	1	0.5	1.2	2.8		9	2.3	0.7	2	5		9	6.8	2.1	1.3	3.3		9	12.7	4.4	4.8	6.2		Total	217.277	93
10	1.5	0.9	0.5	0.5		10	2.7	1.2	1.5	1.3		10	6.1	5.8	2.2	3.6		10	2.3	5.7	3.6	8
11	1.2	1.2	1.2	1		11	4	2	5.8	2		11	10.8	1.6	10	9		11	5	6.7	13.7	8.2		11 dph
12	0.2	2	0.9	1.1		12	0.4	1.7	4.9	1.2		12	2.6	3	8.5	5.6		12	10.5	7.6	8.5	6.1			Sum of Squares	df	Mean Square	F	Sig.
13	2.9	0.5	2.2	0.7		13	1.1	2.1	3.2	3.4		13	3.6	3.8	2.7	6.1		13	10	3.6	12.7	10.6		Between Groups	61.8031	3	20.601	3.23503	0.0264139
14	0.5	0.7	1.4	1.6		14	1.5	4.2	4.1	5.7		14	5.3	5.9	7.8	2.8		14	6.5	8	12.4	6.7		Residuals	522.186	82	6.36812
15	0.4	0.9	1.6	1.2		15	2.3	1.9	3.9	3.7		15	9.9	3.3	6.8	8.2		15	8.3	8.4	11.7	13.1		Total	583.989	85
16	0.5	0.8	2.1	3.6		16	4.3	2.9	2.3	3.2		16	5.5	6.1	9.2	3.8		16	7.1	5.1	6.5	7
17	1.2	0.5	2.3	1.3		17	2.4	3.6	2.6	1.5		17	4.5	6.8	2.3	3.9		17	6.8	2.3	5.3	7.8		13 dph
18	0.8	2.2	1.8	0.4		18	1.9	0.9	1.7	2.1		18	3.3	2.5	2.9	10.1		18	14.1	2.7	2.7	8.2			Sum of Squares	df	Mean Square	F	Sig.
19	2.7	1.3	1.2	1.2		19	2.6	0.3	1.5	4.5		19	3.3	2.1	2.5	4.4		19		2.5	11.7	10.3		Between Groups	183.312	3	61.1039	5.7666	0.00135078
20	1.2	2.3	2.2	0.8		20	2.9	0.6	3	0.9		20	3.4	1.8	6.8	5.6		20		2.6	5.5			Residuals	773.521	73	10.5962
21	1.5	2.5	1.1	0.6		21	1.8	0.8	6.2	1.5		21	10.3	2.3	9.2	5.8		Average	9.13889	5.31	8.9	8.2		Total	956.832	76
22	2	1.1	1	2.5		22	2.5	1	2.3	2		22	4.5		9.4			StDEV	4.61865	2.26829	3.50053	2.11213
23	0.7	0.8	1.1	0.7		23	6.3	0.8	5.2	3.6		Average	5.68182	3.71429	5.75	5.61905		StdEr	1.08863	0.507206	0.782741	0.484557
24	1.3	0.6	2.3	1.1		24	3.3			2.6		StDEV	2.82853	1.87944	3.03578	2.12123
25	1.5	0.7	0.7	1		Average	2.84167	1.74783	3.37826	2.7375		StdEr	0.603046	0.410127	0.64723	0.46289
26	4.2	1.2	4.7	1.7		StDEV	1.56592	1.1135	1.57911	1.42701
27	1.5	0.5	1.7	0.9		StdEr	0.319642	0.232181	0.329268	0.291287
28	1.5	1.8	1.5	1.2
29	1.8	0.7	1	1.1
30	2.3	1.2	2	1
Average	1.49667	1.14333	1.65	1.32
StDEV	0.851998	0.747819	0.613786	0.815026
StdEr	0.155553	0.136532	0.112061	0.148803
Figure 6B																		Kaplan-Meier survival analysis
Number of pupation on each day						Accumulated number of pupation on each day						Percentage of pupation on each day
	Col-0	Col-0	myb28myb29	myb28myb29			Col-0	Col-0	myb28myb29	myb28myb29			Col-0	Col-0	myb28myb29	myb28myb29
DAY	EV control	gss1 RNAi	EV control	gss1 RNAi		DAY	EV control	gss1 RNAi	EV control	gss1 RNAi		DAY	EV control	gss1 RNAi	EV control	gss1 RNAi		Case Processing Summary							Overall Comparisons
12	0	0	0	0		12	0	0	0	0		12	0	0	0	0			Total N	N of Events	Censored					Chi-Square	df	Sig.
13	4	0	2	2		14	5	0	3	3		14	16.6667	0	10	10					N	Percent			Log Rank (Mantel-Cox)	1.72062	3	0.63236
14	1	0	1	1		16	9	4	12	10		16	30	13.3333	40	33.3333		EV control in Col-0	30	18	12	0.4			Breslow (Generalized Wilcoxon)	2.8942	3	0.408226
15	2	2	6	3		18	14	8	14	12		18	46.6667	26.6667	46.6667	40		gss1 RNAi in Col-0	30	19	11	0.366667			Tarone-Ware	2.30364	3	0.511825
16	2	2	3	4		20	17	14	16	13		20	56.6667	46.6667	53.3333	43.3333		EV control in myb28myb29	30	19	11	0.366667
17	1	1	1	1		22	18	16	19	18		22	60	53.3333	63.3333	60		gss1 RNAi in myb28myb29	30	18	12	0.4
18	4	3	1	1		24	18	19	19	18		24	60	63.3333	63.3333	60		Overall	120	74	46	0.383333
19	1	3	1	0
20	2	3	1	1														Means and Medians for Survival Time
21	1	1	2	4															Meana				Median
22	0	1	1	1															Estimate	Std. Error	95% Confidence Interval		Estimate	Std. Error	95% Confidence Interval
23	0	2	0	0																	Lower Bound	Upper Bound			Lower Bound	Upper Bound
24	0	1	0	0														EV control in Col-0	18.3	0.559727	17.2029	19.3971	19	1.17369	16.6996	21.3004
																		gss1 RNAi in Col-0	20.9	0.5899	19.7438	22.0562	21	1.56492	17.9328	24.0672
																		EV control in myb28myb29	18.6	0.628873	17.3674	19.8326	19	2.19089	14.7059	23.2941
Figure 6C																		gss1 RNAi in myb28myb29	19.1333	0.61306	17.9317	20.3349	21	0.67854	19.6701	22.3299
	Pupal mortality																	Overall	19.8611	0.359789	19.1559	20.5663	20	0.730297	18.5686	21.4314
#1	Col-0	Col-0	myb28myb29	myb28myb29
	EV control	gss1 RNAi	EV control	gss1 RNAi		A two-sided proportions test
Pupae number	33	33	30	31			X-squared	df	P-value
Emerged number	24	23	22	24		#1	0.49206	3	0.9206
Percentage of emergence	72.7273	69.697	73.3333	77.4194		#2	0.76639	3	0.8575
percentage of mortality	27.2727	30.303	26.6667	22.5806		#3	1.2245	3	0.7471
#2	Col-0	Col-0	myb28myb29	myb28myb29
	EV control	gss1 RNAi	EV control	gss1 RNAi
Pupae number	30	30	30	30
Emerged number	21	23	20	21
Percentage of emergence	70	76.6667	66.6667	70
percentage of mortality	30	23.3333	33.3333	30
#3	Col-0	Col-0	myb28myb29	myb28myb29
	EV control	gss1 RNAi	EV control	gss1 RNAi
Pupae number	35	35	35	35
Emerged number	26	25	22	25
Percentage of emergence	74.2857	71.4286	62.8571	71.4286
percentage of mortality	25.7143	28.5714	37.1429	28.5714
Figure 6D
	Number of egg laid					Tukey HSD tests in conjuction with a one-way ANOVA
#	Col-0	Col-0	myb28myb29	myb28myb29		Number of egg laid
	EV control	gss1 RNAi	EV control	gss1 RNAi			Sum of Squares	df	Mean Square	F	Sig.
1	25	9	14	30		Between Groups	2.21686	3	0.738954	0.0175034	0.996812
2	19	23	18	20		Residuals	2448.62	58	42.2176
3	31	18	18	25		Total	2450.84	61
4	27	13	22	26
5	19	17	24	18
6	15	24	16	20
7	16	22	19	14
8	24	19	28	10
9	12	22	32	26
10	11	18	26	18
11	34	27	28	22
12	33	32	30	30
13	22	28	10	20
14	24	26	16	18
15	10		14	16
16	22			20
17				26
Average	21.5	21.2857	21	21.1176
StDEV	7.53658	6.14477	6.68687	5.47588
StdEr	1.88414	1.64226	1.72654	1.3281
Figure 6E
Choice assay
#1	Total number	EV control in Col-0	gss1 RNAi in Col-0
number	38	21	17		A two-sided binomial test
percentage		55.2632	44.7368		#1	Comparation		P-value
	Total number	EV control in myb28myb29	gss1 RNAi in myb28myb29			EV control in Col-0	gss1 RNAi in Col-0	0.313248
number	37	21	16			EV control in myb28myb29	gss1 RNAi in myb28myb29	0.0936836
percentage		56.7568	43.2432			EV control in Col-0	EV control in myb28myb29	0.149446
	Total number	EV control in Col-0	EV control in myb28myb29			gss1 RNAi in Col-0	gss1 RNAi in myb28myb29	0.132061
number	27	13	14
percentage		48.1481	51.8519
	Total number	gss1 RNAi in Col-0	gss1 RNAi in myb28myb29		#2	Comparation		P-value
	35	18	17			EV control in Col-0	gss1 RNAi in Col-0	0.135435
		51.4286	48.5714			EV control in myb28myb29	gss1 RNAi in myb28myb29	0.123485
						EV control in Col-0	EV control in myb28myb29	0.12952
#2	Total number	EV control in Col-0	gss1 RNAi in Col-0			gss1 RNAi in Col-0	gss1 RNAi in myb28myb29	0.126406
number	30	16	14
percentage		53.3333	46.6667
	Total number	EV control in myb28myb29	gss1 RNAi in myb28myb29		#3	Comparation		P-value
number	31	14	17			EV control in Col-0	gss1 RNAi in Col-0	0.125371
percentage		45.1613	54.8387			EV control in myb28myb29	gss1 RNAi in myb28myb29	0.0945276
	Total number	EV control in Col-0	EV control in myb28myb29			EV control in Col-0	EV control in myb28myb29	0.114404
number	27	15	12			gss1 RNAi in Col-0	gss1 RNAi in myb28myb29	0.135435
percentage		55.5556	44.4444
	Total number	gss1 RNAi in Col-0	gss1 RNAi in myb28myb29		A generalized linear model (GLM) with a binomial distribution and a logit link function
	29	13	16		Between different treatments
		44.8276	55.1724				Estimate	Std. Error	Z value	P value
						(Intercept)	-0.07804	1.41529	-0.055	0.956
#3	Total number	EV control in Col-0	gss1 RNAi in Col-0		gss1 RNAi in Col-0 compared with	EV control in Col-0	0.14607	2.00134	0.073	0.942
number	39	19	20			EV control in myb28myb29	0.25248	2.00457	0.126	0.9
percentage		48.7179	51.2821			gss1 RNAi in myb28myb29	-0.08633	2.00414	-0.043	0.966
	Total number	EV control in myb28myb29	gss1 RNAi in myb28myb29
number	35	15	20
percentage		42.8571	57.1429
	Total number	EV control in Col-0	EV control in myb28myb29
number	44	21	23
percentage		47.7273	52.2727
	Total number	gss1 RNAi in Col-0	gss1 RNAi in myb28myb29
	30	16	14
		53.3333	46.6667
Figure 6F
No-choice assay						A two-sided proportions test
	Col-0	Col-0	myb28myb29	myb28myb29			X-squared	df	P-value
	EV control	gss1 RNAi	EV control	gss1 RNAi		#1	0.96303	3	0.8102
Total number	23	23	21	21		#2	0.38212	3	0.9439
#1	16	13	14	13		#3	0.74604	3	0.8623
#2	12	11	10	9		#3	0.58192	3	0.9006
#3	14	12	13	11
#4	15	13	14	13
% preyed
#1	69.5652	56.5217	66.6667	61.9048
#2	52.1739	47.8261	47.619	42.8571
#3	60.8696	52.1739	61.9048	52.381
#4	65.2174	56.5217	66.6667	61.9048
Figure 6G
Plutella survivorship on Arabidopsis in presence of lacewings						A two-sided proportions test
	Col-0	Col-0	myb28myb29	myb28myb29			X-squared	df	P-value
#1	EV control	gss1 RNAi	EV control	gss1 RNAi		#1	0.91545	3	0.8217
# larvae used in the assay (assay in plant growth chamber)	40	40	40	40		#2	3.5294	3	0.317
# larvae preyed upon	29	29	32	31
% larvae preyed upon	72.5	72.5	80	77.5
	Col-0	Col-0	myb28myb29	myb28myb29
#2	EV control	gss1 RNAi	EV control	gss1 RNAi
# larvae used in the assay (assay in plant growth chamber)	40	40	40	40
# larvae preyed upon	36	33	36	31
% larvae preyed upon	90	82.5	90	77.5
