# Supplementary material for: Tritrophic metabolism of plant chemical defenses and its effects on herbivore and predator performance
Source: eLife. 2019 Dec 16;8:e51029. doi: 10.7554/eLife.51029 (PMC6934381; doi:10.7554/eLife.51029)
Supplement: Supplementary file 1. [file elife-51029-supp1.xlsx]

## Sheet: Supplementary File 1
Supplementary File 1
Primer sets for gene cloning and qRT-PCR validation
Name	Primer (5’à3’)	Function	Gene accession
gss1F	ACGACAGTATCGGAGAAATCGT	526bp for silencing	MG022096
gss1R	CGCAGCTTCTGCTTGTAGTCTG
gss1VF	GCGGCGGAATTCCGCAGCTTCTGCTTGTAGTCTG	Ligation to pTRV2
gss1VR	GCGGCGTCTAGAACGACAGTATCGGAGAAATCGT
gss1FLF	ATGGCGATTCTGCATCAAGCTGT	Full length
gss1FLR	CTATTCGGAGTCGGAGTAGGGTT
gss1QF	CATCAAGCTGTGGTGCTCCTC	QPCR/ riboprobe
gss1QR	CTGCCGTCAAGCTGCTCC
gss2QF	CTGCATCAAGTAGTGGTGATTCTG		MG022097
gss2QR	GCTTGCCGTCAAGCCTCGAT
gss3QF	CTGAGGTCGCTGAAGGAAAC		MG022099
gss3QR	TGATGTCGTACAGGCACCAT
sulfataseQF	CGCCTCTATGCTGGTATGGT	QPCR	XM011561926
sulfataseQR	CGACACGAATGCGATGAT
arylsulfatase-bQF	ATGGCATGAGAGGAGGCTAT		XM011552133
arylsulfatase-bQR	TCTTGAGCCTTGAAGCCATC
sumf1QF	AGACTAGTGTGACCAAACCCG		XM011551885
sumf1QR	AAATCTCATTGGGCCCTCGTTG
cyp6cv2QF	CCTGGCACCCTGAATTTCCT		HQ829967
cyp6cv2QR	CTCTCGCCCACGATCTTGTT
cyp6bg1QF	CCGTCCCTGTTCTACGCTTT		KX844829
cyp6bg1QR	TCAGGCTGCGCTCCTTAAAT
cyp9g2QF	GGAATTGCATCGCATCTCGG		AB112959
cyp9g2QR	TTGCCGCACTTCTGGATCTC
cyp9g4QF	GGGTTCCCGATGTTTGGAAAT		FJ023535
cyp9g4QR	ATCAGGTACAGCGGCACAAA
gsto2QF	ACATGCGCTACTGTCCCTTT		KF929209
gsto2QR	TTCCCGAATGCACTCTTGCT
gste3QF	CACCACGCCCGAGTATCTTA		U66342
gste3QR	CGCTCTTGCCGTATTTGTCC
cceo16bQF	GAAGCGCACTAAAGCATGGG		KM008609
cceo16bQR	GGCTTGCTTGGCTTGATGTC
ugtQF	TACGGGTACACGCCTTTCTG		XM011558530
ugtQR	TACAGGGCCGAGATGTGGTA
UbiquitinQF	CGACTGATCTTCGCTGGTAAAC		NM001305519
UbiquitinQR	TCCTCTAAGCCTCAACACCAAG
