# Supplementary material for: Tritrophic metabolism of plant chemical defenses and its effects on herbivore and predator performance
Source: eLife. 2019 Dec 16;8:e51029. doi: 10.7554/eLife.51029 (PMC6934381; doi:10.7554/eLife.51029)
Supplement: Supplementary file 2. [file elife-51029-supp2.xlsx]

## Sheet: Supplementary File 2
Supplementary File 2
The sources of Plutella xylostella moths for adult fecundity experiments
Figure 2C,E,G		Figure 2D,F,H
paired couples		paired couples
Female	Male	Female	Male
EV control in Col-0	EV control in Col-0	EV control in Col-0	EV control in Col-0
gss1 RNAi in Col-0			gss1 RNAi in Col-0
Ev control in myb28myb29			Ev control in myb28myb29
gss1 RNAi in myb28myb29			gss1 RNAi in myb28myb29
Figure 2 - supplement figure 2A,E,I		Figure 2 - supplement figure 2B,F,J		Figure 2 - supplement figure 2C,G,K		Figure 2 - supplement figure 2D,H,L
paired couples		paired couples		paired couples		paired couples
Female	Male	Female	Male	Female	Male	Female	Male
EV control in Col-0	Col-0	Col-0	EV control in Col-0	EV control in Col-0	myb28myb29	myb28myb29	EV control in Col-0
gss1 RNAi in Col-0			gss1 RNAi in Col-0	gss1 RNAi in Col-0			gss1 RNAi in Col-0
Ev control in myb28myb29			Ev control in myb28myb29	Ev control in myb28myb29			Ev control in myb28myb29
gss1 RNAi in myb28myb29			gss1 RNAi in myb28myb29	gss1 RNAi in myb28myb29			gss1 RNAi in myb28myb29
Figure 4C,E,G		Figure 4D,F,H
paired couples		paired couples
Female	Male	Female	Male
EV control with 4MSOB-ITC in myb28myb29	myb28myb29	myb28myb29	EV control with 4MSOB-ITC in myb28myb29
EV control with solvent in myb28myb29			EV control with solvent in myb28myb29
gss1 RNAi with solvent in myb28myb29			gss1 RNAi with solvent in myb28myb29
gss1 RNAi with 4MSOB-ITC in myb28myb29			gss1 RNAi with 4MSOB-ITC in myb28myb29
