# Supplementary material for: Tritrophic metabolism of plant chemical defenses and its effects on herbivore and predator performance
Source: eLife. 2019 Dec 16;8:e51029. doi: 10.7554/eLife.51029 (PMC6934381; doi:10.7554/eLife.51029)
Supplement: Supplementary file 3. — Q1, quadrupole one voltage; Q3, quadrupole three voltage; DP, declustering potential; EP, entrance potential; CEP, collision cell entrance potential; CE, collision energy; CXP, collision cell exit potential. [file elife-51029-supp3.xlsx]

## Sheet: Supplementary File 3
Supplementary File 3
LC-MS/MS parameters used for the multiple reaction monitoring (MRM) analyses of I3C derivatives
GLS metabolites	Ionization mode	Q1 m/z	Q3 MRM fragment	Retention time (min)	Dp (V)	EP (V)	CEP (V)	CE (V)	CXP (V)
I3C-Ascorbate-1	Positive mode	306.036	130.1	3.22	36	8	20	21	4
I3C-Ascorbate-2		306.036	76.8	3.22	36	8	20	87	4
I3C-GSH-1		437.03	308	2.62	41	3	18	19	12
I3C-GSH-2		437.03	130.1	2.62	41	3	18	47	4
I3C-CG-1		308.016	130	2.95	106	4.5	26	21	4
I3C-CG-2		308.016	76	2.95	106	4.5	26	35	4
I3C-Cys-1		251.067	130	2.88	21	2	14	25	4
I3C-Cys-2		251.067	77	2.88	21	2	14	77	4
I3C-NAC-1		293.029	130.1	4.6	21	8	14	17	4
I3C-NAC-2		293.029	76.9	4.6	21	8	14	83	4
