# Supplementary material for: Tritrophic metabolism of plant chemical defenses and its effects on herbivore and predator performance
Source: eLife. 2019 Dec 16;8:e51029. doi: 10.7554/eLife.51029 (PMC6934381; doi:10.7554/eLife.51029)
Supplement: Supplementary file 4. [file elife-51029-supp4.xlsx]

## Sheet: Supplementary File 4
Supplementary File 4
External standards used for quantification
Compounds	Supplier
4MSOB	Carl Roth, Karlsruhe, Germany
Desulfo-4MSOB	Achieved by incubating 4MSOB with sulfatase (Graser et al. 2000) overnight
4MSOB-ITC	BIOZOL Diagnostica Vertrieb, Eching, Germany
4MSOB-ITC-GSH	Santa Cruz Biotechnology, Dallas, TX, United States
4MSOB-ITC-CG	Synthesized as described in (Schramm et al. 2012)
4MSOB-ITC-Cys	Santa Cruz Biotechnology, Dallas, TX, United States
4MSOB-ITC-NAC	Santa Cruz Biotechnology, Dallas, TX, United States
I3M	Carl Roth, Karlsruhe, Germany
Desulfo-I3M	Achieved by incubating I3M with sulfatase (Graser et al. 2000) overnight
I3C	Sigma-Aldrich, Munich, Germany
I3C-Ascorbate	Carbosynth Limited, Berkshire, UK
